# Supplementary material for: Illuminating milling mechanochemistry by tandem real-time fluorescence emission and Raman spectroscopy monitoring
Source: Royal Society of Chemistry journal article supplement (doi:10.1039/d3sc04082h), 2023-01-01
Supplement: d3sc04082h1.pdf [file d3sc04082h1.pdf]

## Electronic Supplementary Information for:

### Illuminating mechanochemical reactions by tandem real-time fluorescence emission and Raman spectroscopic monitoring

Authors: Patrick A. Julien\*, Mihails Arhangeliskis\*, Luzia S. Germann, Martin Etter, Robert E. Dinnebier, Andrew J. Morris\* and Tomislav Friščić\*

#### Table of Contents

|                                                                                                            |    |
|------------------------------------------------------------------------------------------------------------|----|
| 1. X-ray Powder Diffraction .....                                                                          | 2  |
| 2. Experimental Setup .....                                                                                | 3  |
| 3. Fluorescence Excitation and Emission Spectra and Lifetime Measurements .....                            | 4  |
| 4. Band-Gap Measurements.....                                                                              | 4  |
| 5. Raman Spectra of Starting Materials and Products .....                                                  | 8  |
| 6. Fitting of <i>in situ</i> spectroscopy datasets for ball-milling cocrystallisation of ind and sac ..... | 9  |
| 7. Solid-State <sup>13</sup> C NMR and FTIR-ATR Spectroscopy .....                                         | 11 |
| 8. <i>In situ</i> Synchrotron Powder X-ray Diffraction Monitoring of Cocrystallisation by Milling .....    | 12 |
| 9. Comparison of Predicted and Experimental Vibrational Spectra .....                                      | 13 |
| 10. Comparison of Predicted and Experimental NMR Spectra .....                                             | 19 |
| 11. TD-DFT Orbital Transitions.....                                                                        | 23 |
| 12. Fitting of <i>in situ</i> spectroscopy datasets of indometacin amorphisation by milling ...            | 24 |
| 13. Kinetic modelling of amorphisation .....                                                               | 26 |
| 14. Solid-State NMR and FTIR-ATR spectroscopy for indometacin amorphisation by ball-milling .....          | 29 |

# 1. X-ray Powder Diffraction

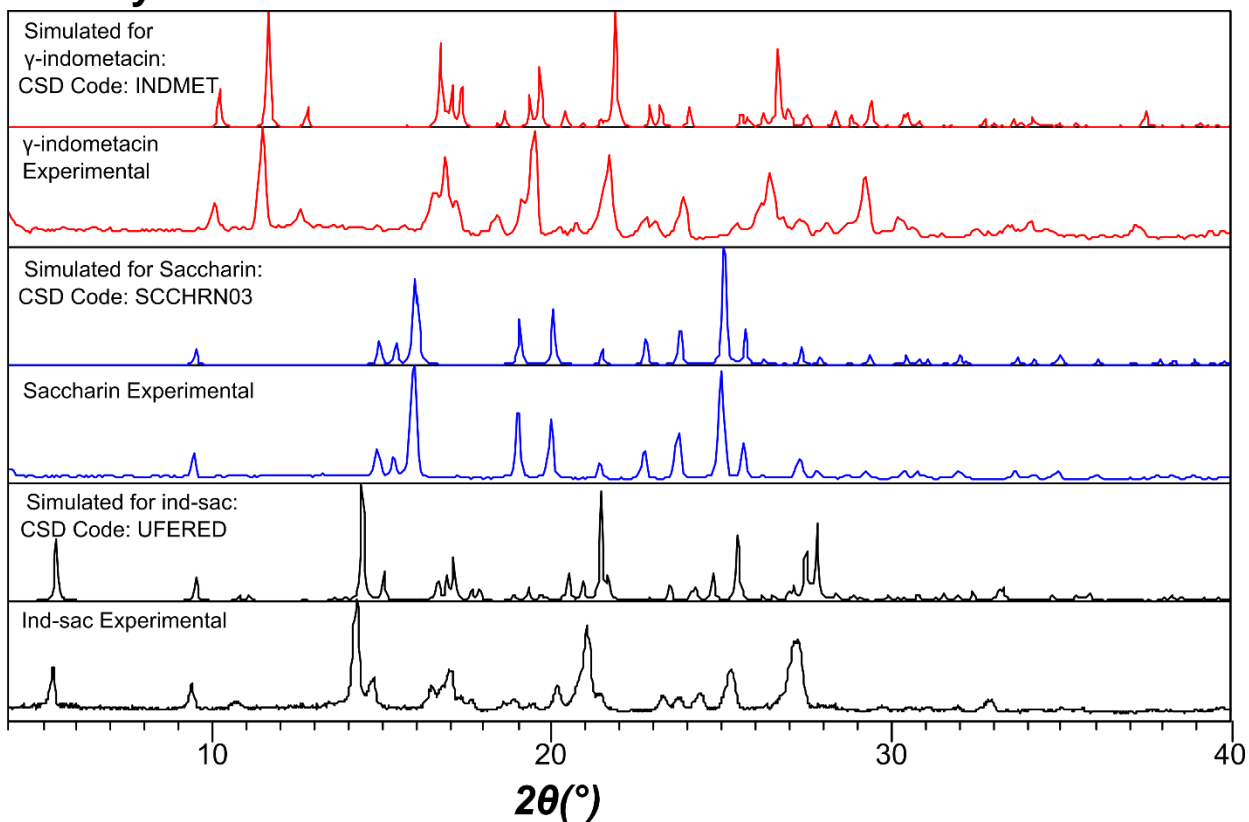

**Figure S1.** X-ray powder diffraction patterns of commercial  $\gamma$ -ind (red), sac (blue) and ind-sac (black) obtained from milling synthesis compared with the respective simulated XRPD patterns based on reported crystal structures (CSD codes INDMET and SCCHR03).

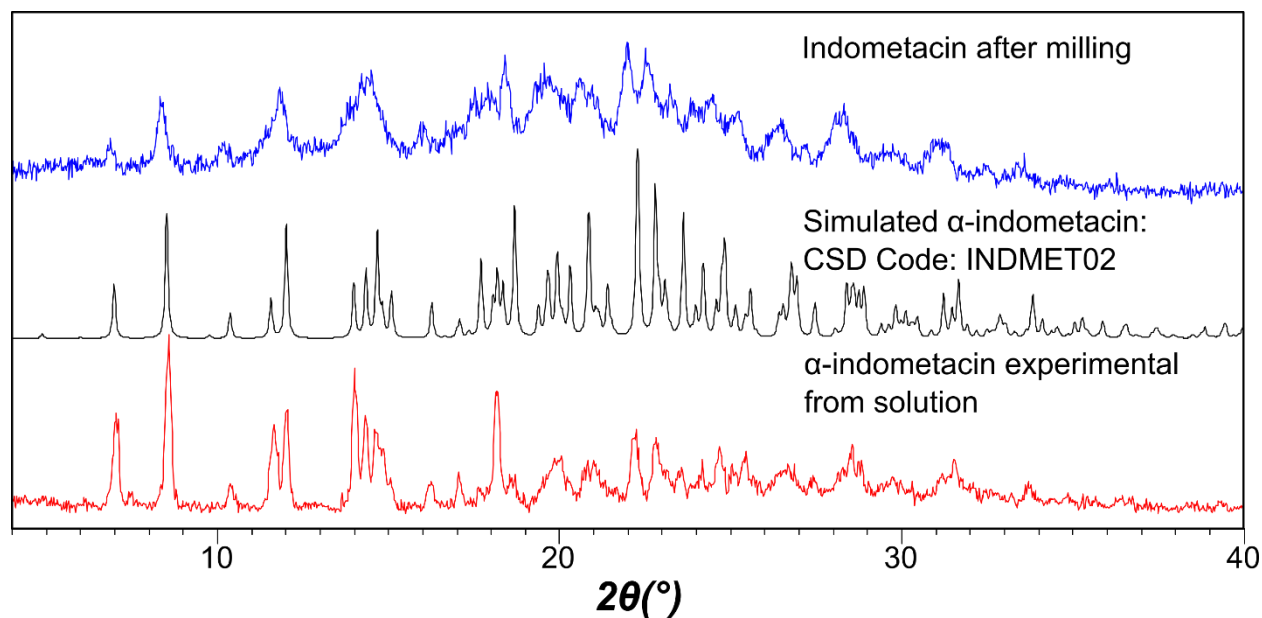

**Figure S2.** The XRPD pattern of a sample of solid ind after milling (top) compared with the patterns simulated for the reported structure of  $\alpha$ -ind (middle) and measured for  $\alpha$ -ind made from solution (bottom).

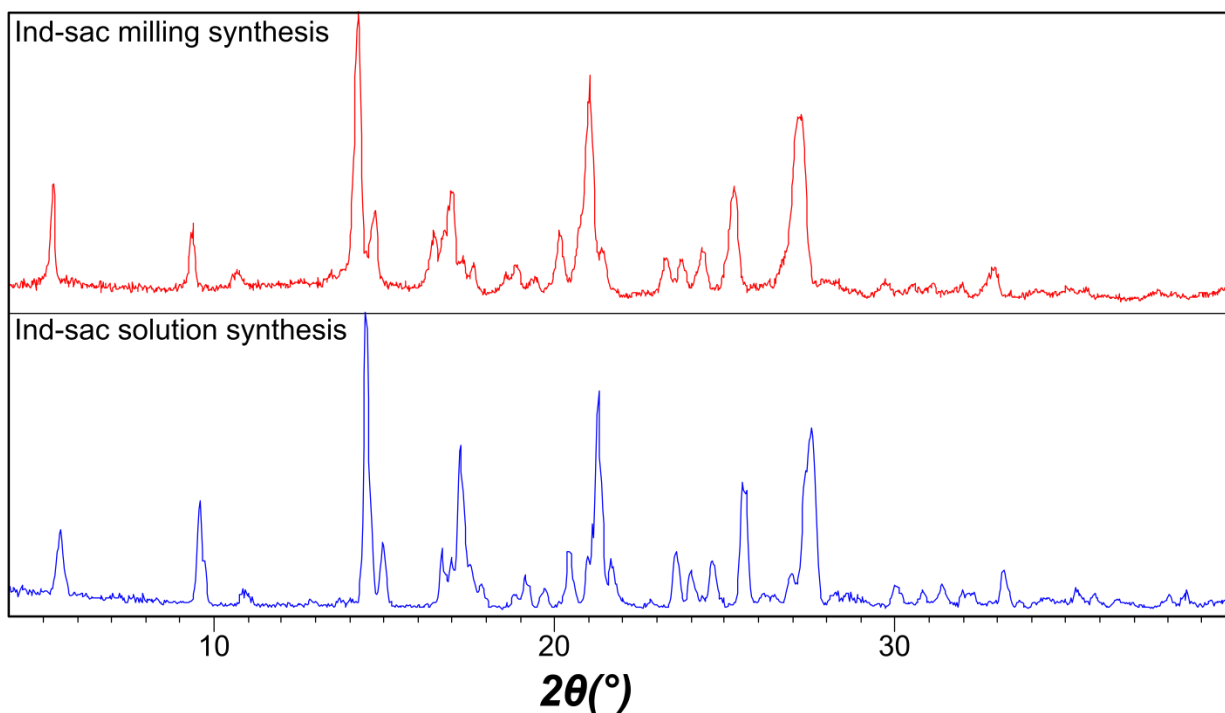

**Figure S3.** Overlay of the XRPD patterns of **ind-sac** cocrystal after milling (top) and **ind-sac** cocrystal synthesised from solution (bottom).

## 2. Experimental Setup

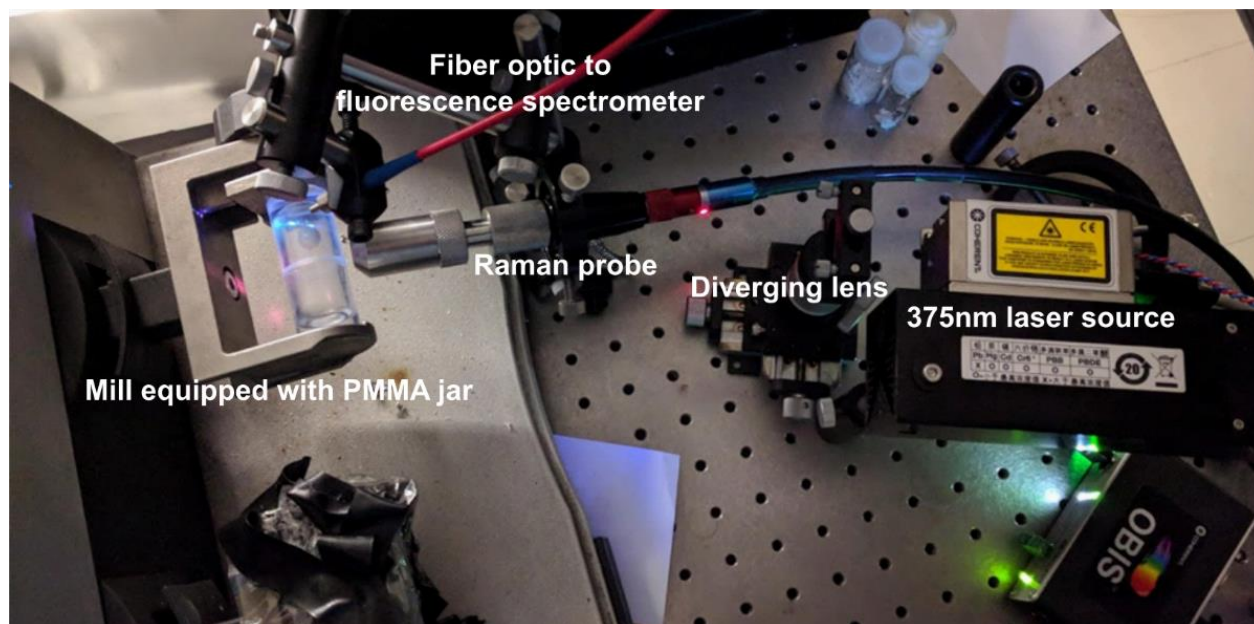

**Figure S4.** Picture of the experimental setup, showing an empty 15 mL volume poly(methyl methacrylate ) (PMMA) jar mounted on a milling station of the Retsch™ MM400 mixer mill, loaded with a zirconia milling ball. The bottom probe is the Raman spectroscopy probe of a Kaiser Optics RXN1 system, while the blue and red fiber optic connects to the QE65000 spectrometer used for fluorescence measurements. A 375nm OBIS laser source and diverging lens provide the excitation source for fluorescence measurements.

### 3. Fluorescence Excitation and Emission Spectra and Lifetime Measurements

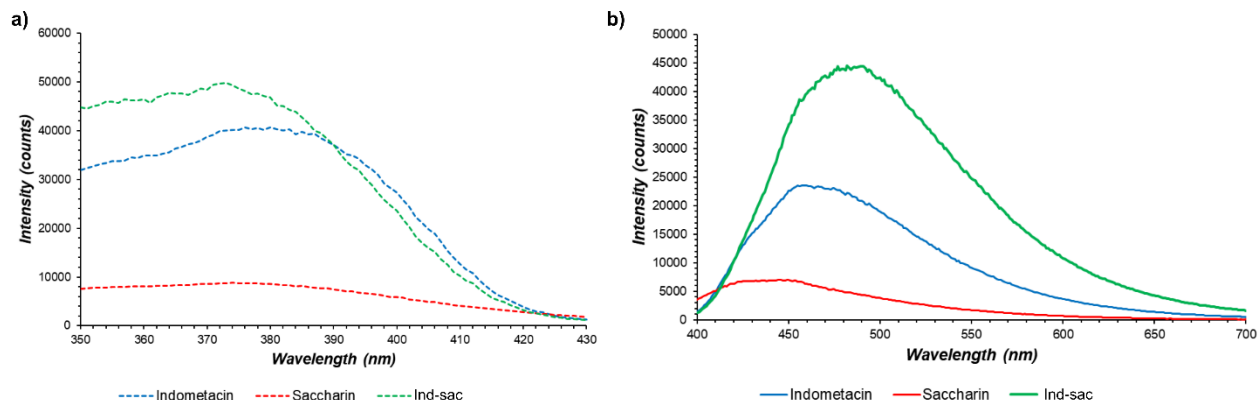

**Figure S5.** a) Excitation spectra monitored at 450 nm of  $\gamma$ -ind (blue), sac (red) and ind-sac (green); b) fluorescence emission spectra of solid  $\gamma$ -ind, sac, and ind-sac, under excitation at 380 nm. All spectra were recorded on a well-plate reader.

**Table S1.** Lifetimes of  $\gamma$ -indometacin, saccharin, and ind-sac cocrystal.

| Compound      | Fluorescence Lifetime $\langle\tau\rangle$ (ns) | Chi Squared $\chi^2$ |
|---------------|-------------------------------------------------|----------------------|
| $\gamma$ -ind | 1.78                                            | 1.032                |
| sac           | 4.29                                            | 4.56                 |
| ind-sac       | 5.62                                            | 1.17                 |

### 4. Band-Gap Measurements

**Table S2.** Band gaps (in eV) for the different crystalline phases, measured by UV-Vis spectroscopy.

| Phase             | Measured band gap / eV |
|-------------------|------------------------|
| ind-sac cocrystal | 2.95(2)                |
| $\gamma$ -ind     | 2.95(3)                |
| $\alpha$ -ind     | 2.88(2)                |
| am-ind            | 2.56(1)                |

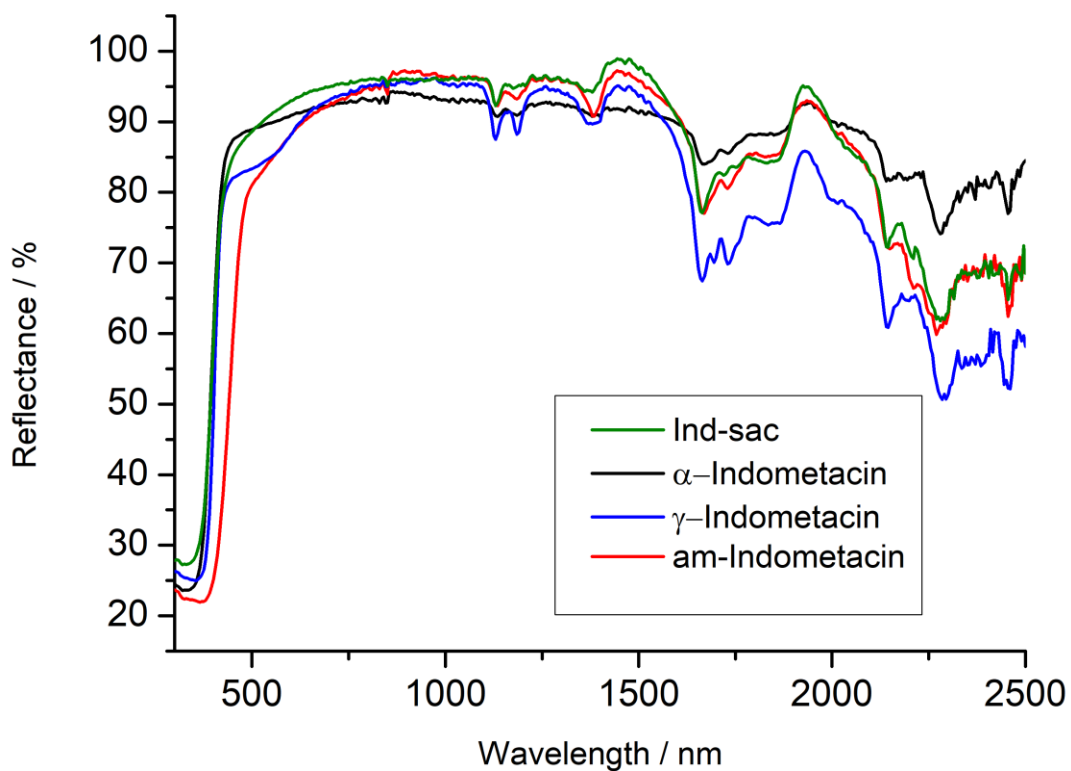

**Figure S6.** Overlay of full UV-Vis spectra for the **ind-sac** cocrystal (green line), **α-ind** (black line), **γ-ind** (blue line), and **am-ind** (red line).

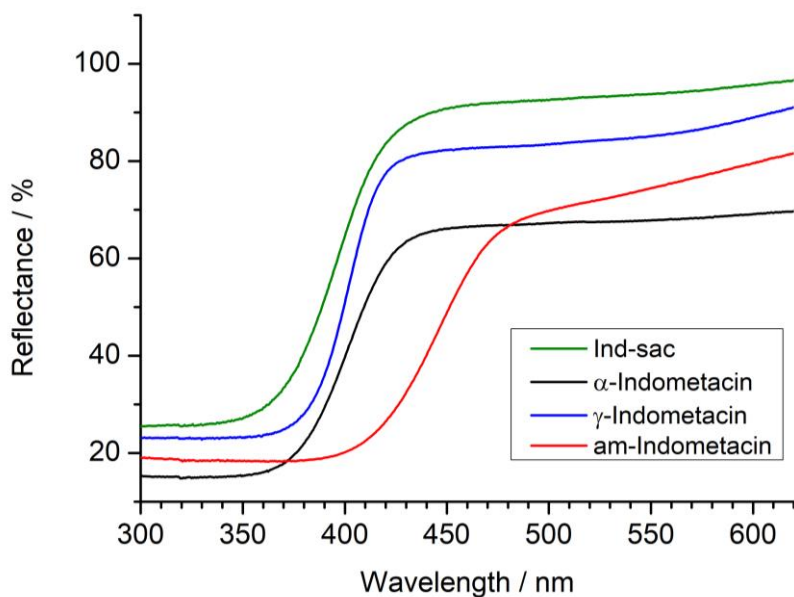

**Figure S7.** Overlay of UV-Vis spectra for the **ind-sac** cocrystal (green line), **α-ind** (black line), **γ-ind** (blue line), and **am-ind** (red line), used to calculate the respective band gaps.

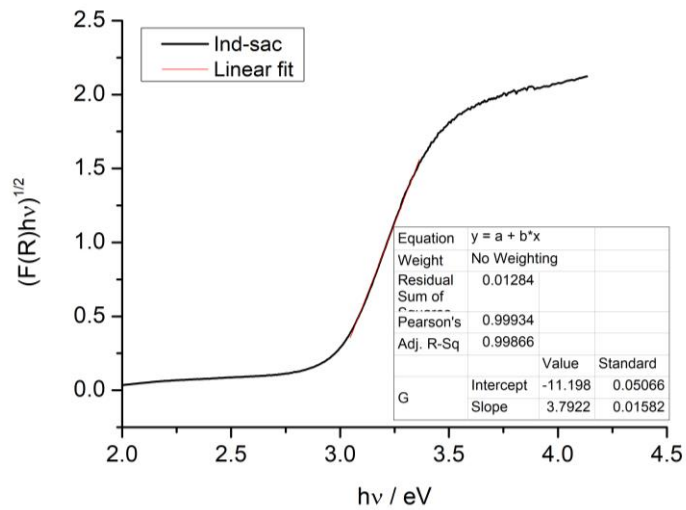

**Figure S8.** Linear fit of the UV-Vis spectrum of solid **ind-sac** used for band gap determination.

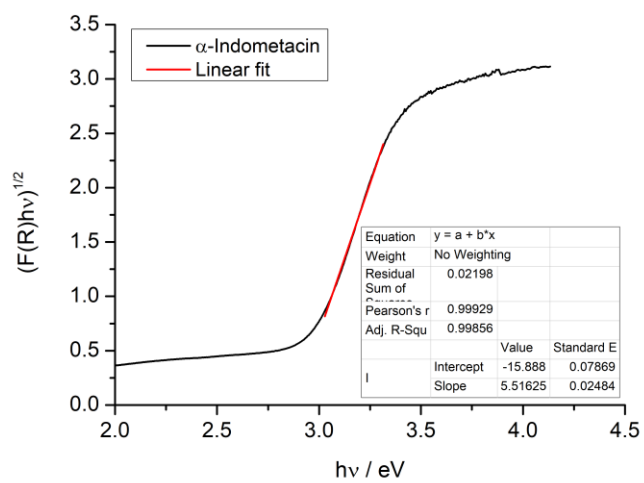

**Figure S9.** Linear fit of the UV-Vis spectrum of solid **α-ind** used for band gap determination.

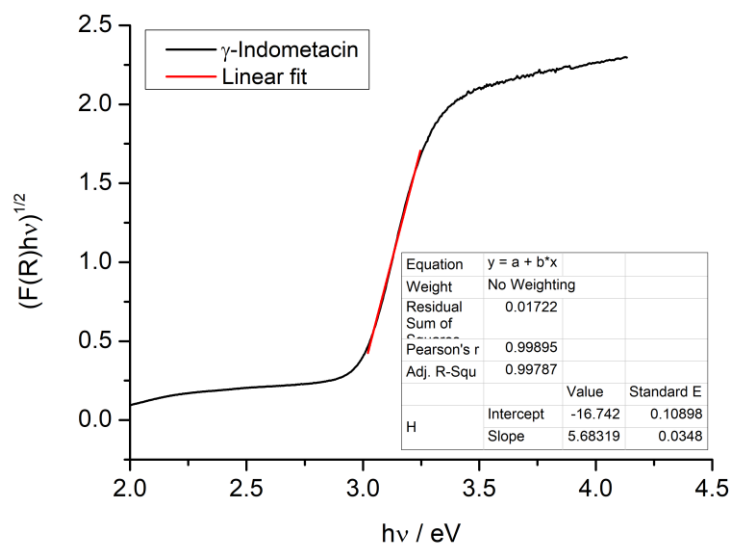

**Figure S10.** Linear fit of the UV-Vis spectrum of solid  **$\gamma$ -ind** used for band gap determination.

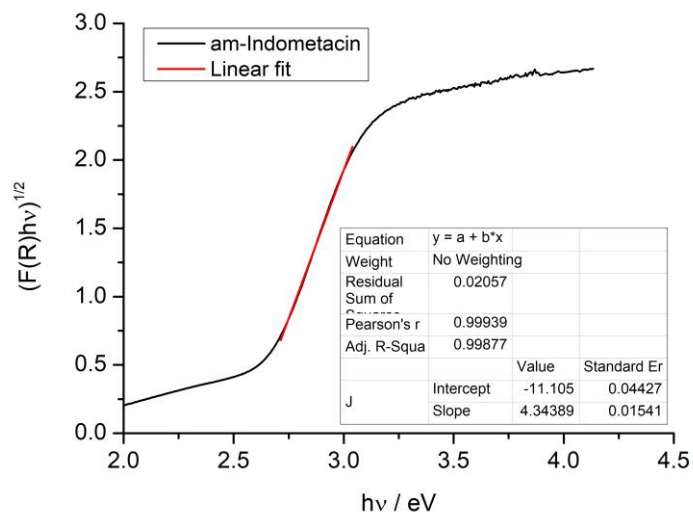

**Figure S11.** Linear fit of the UV-Vis spectrum of solid **am-ind** used for band gap determination.

## 5. Raman Spectra of Starting Materials and Products

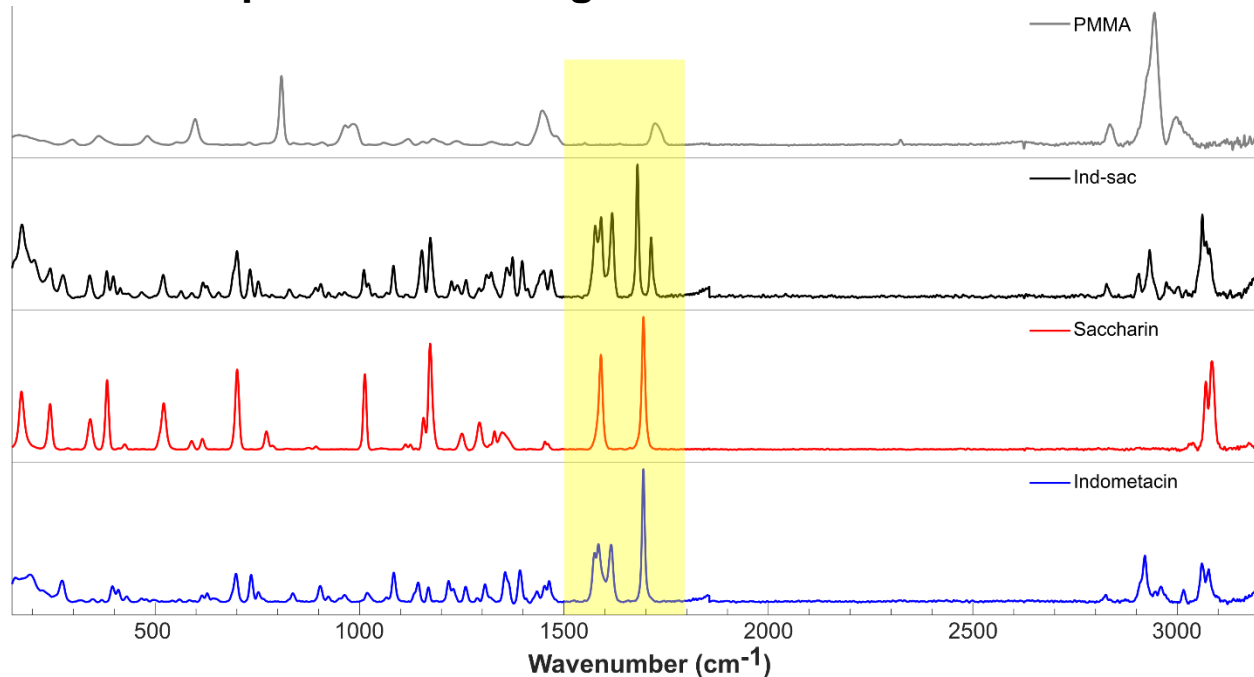

**Figure S12.** Comparison of baseline-corrected Raman spectra for solid samples of (bottom-to-top):  $\gamma$ -ind, sac, and ind-sac cocrystal along with the Raman spectrum of the PMMA milling jar which can interfere with the sample signal. The highlighted region between 1500-1800  $\text{cm}^{-1}$  was used for reaction monitoring due to strong sample signals and minimal interference from PMMA.

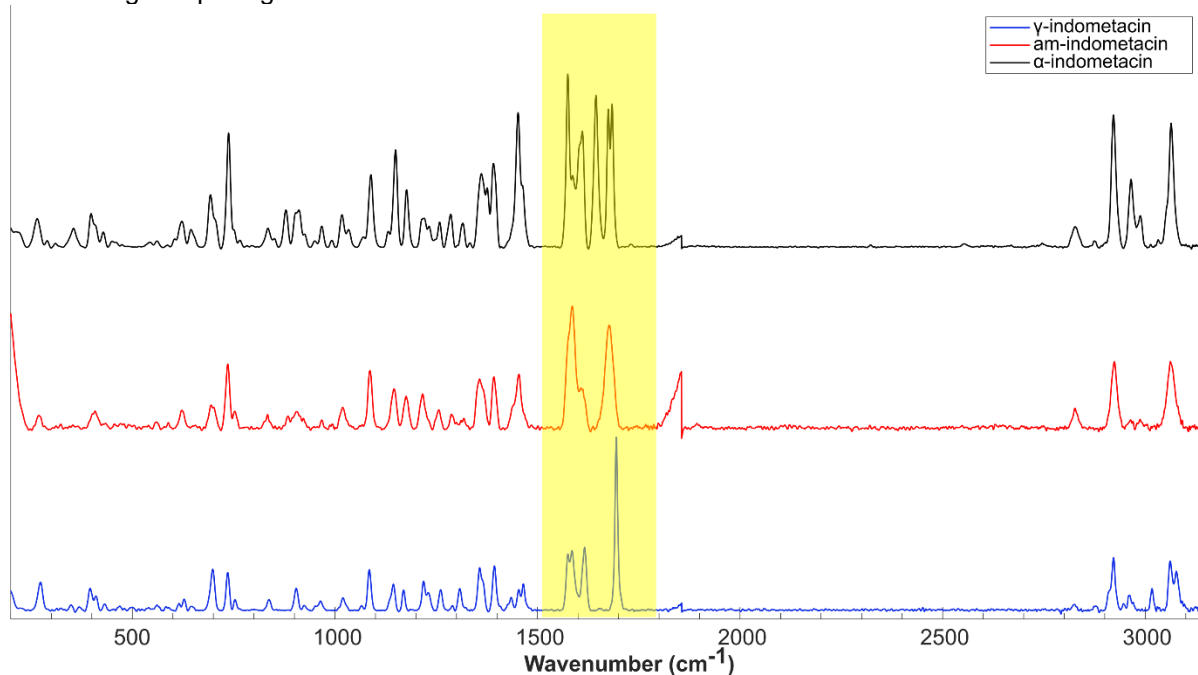

**Figure S13.** Baseline corrected Raman spectra for solid samples of (bottom-to-top):  $\gamma$ -,  $\alpha$ -, and am-ind. The region between 1500-1800  $\text{cm}^{-1}$  was used for reaction monitoring due to strong sample signals and minimal interference from the PMMA milling vessel.



## 6. Fitting of *in situ* spectroscopy datasets for ball-milling cocrystallisation of ind and sac

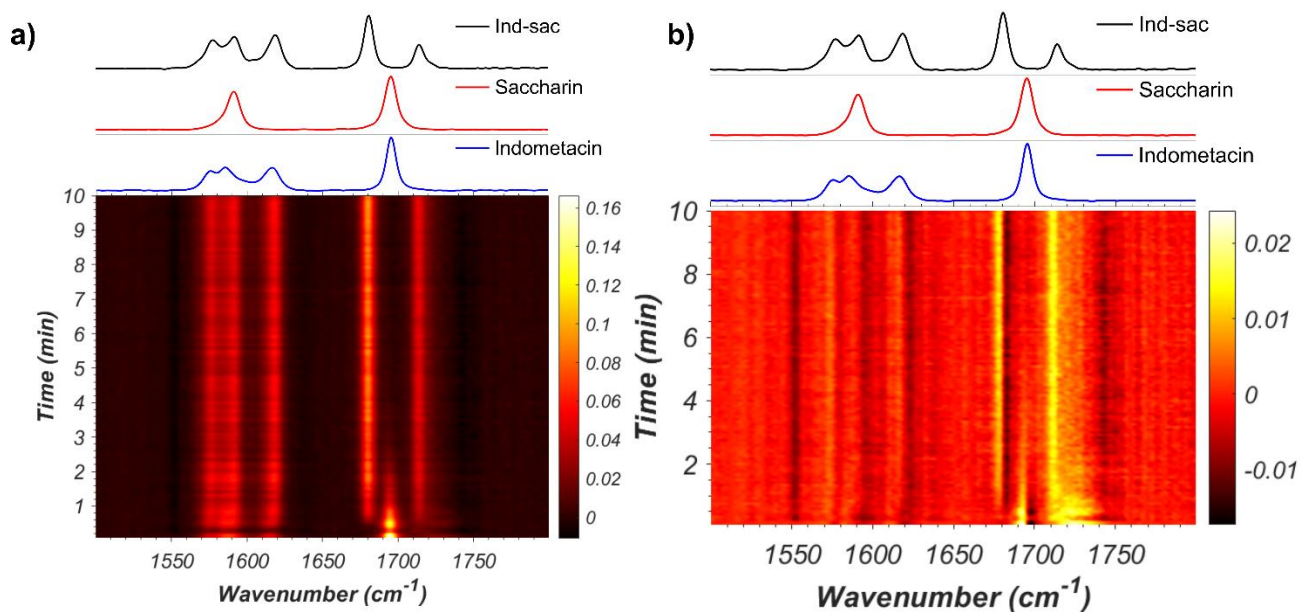

**Figure S14.** (a) (top) Raman spectra of solid  $\gamma$ -ind, sac, and ind-sac cocrystal and (bottom) normalised time-resolved Raman spectra acquired during the mechanochemical ball-milling synthesis of the ind-sac cocrystal. (b) (top) Raman spectra of solid  $\gamma$ -ind, sac, and the ind-sac cocrystal and (bottom) time-dependent residuals of the NNLS fitting.

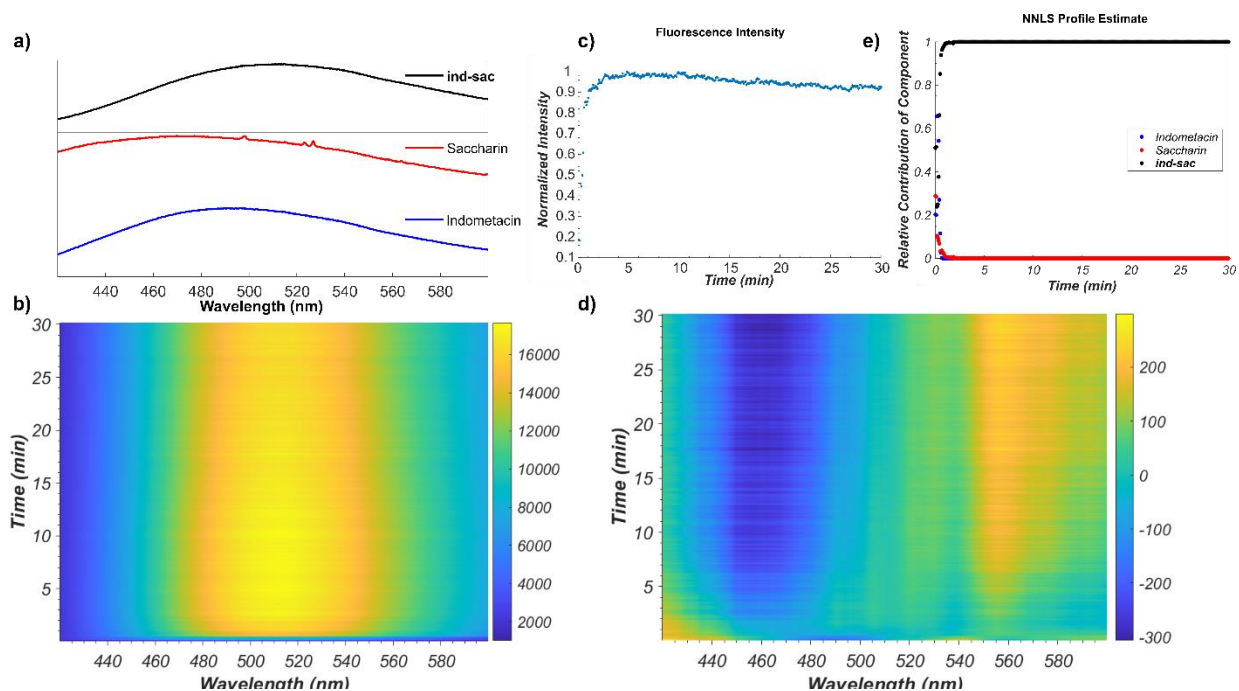

**Figure S15.** (a) Fluorescence emission behaviour of solid  $\gamma$ -ind, sac, and ind-sac samples. (b) Time-resolved fluorescence emission data acquired during the mechanochemical ball-milling synthesis of the ind-sac cocrystal. (c) Overall fluorescence intensity during the reaction normalised to the maximum emission intensity (d) Time-dependent residuals after NLS fitting. (e) Relative amounts of  $\gamma$ -ind, sac, and the ind-sac cocrystal estimated using non-negative least squares fitting of the in situ measured dataset.

## 7. Solid-State $^{13}\text{C}$ NMR and FTIR-ATR Spectroscopy

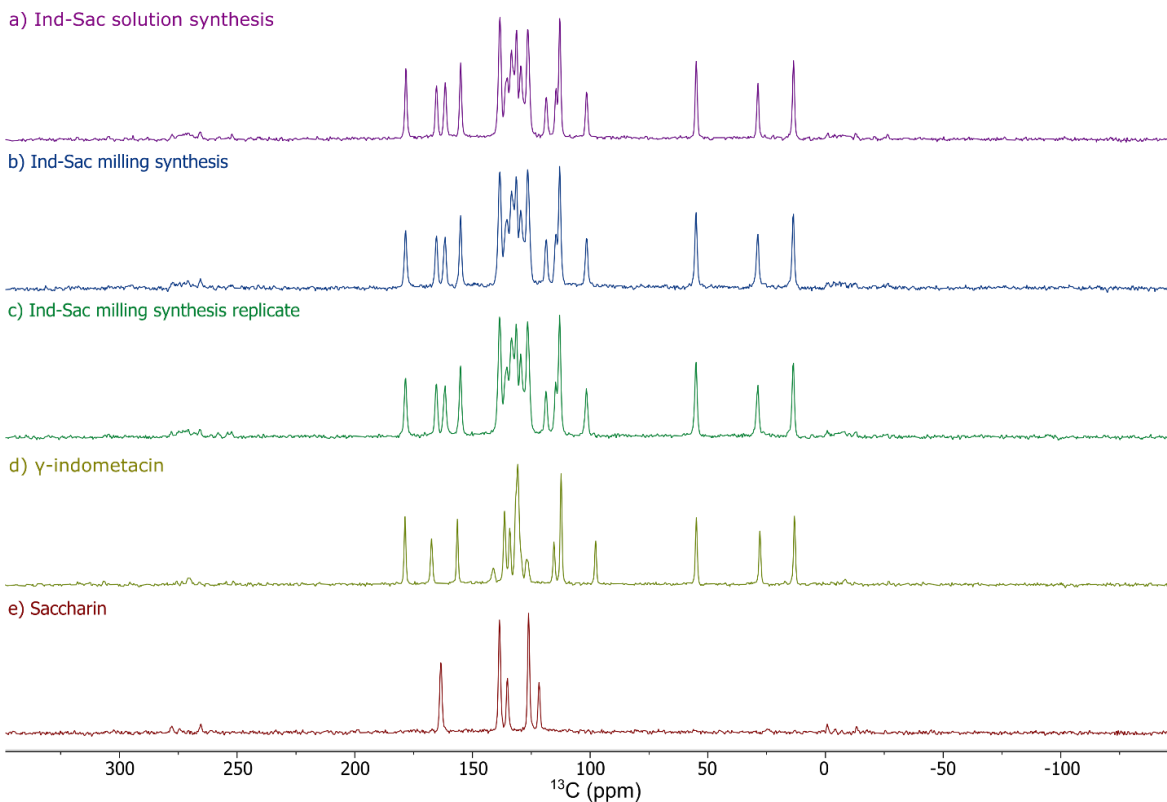

**Figure S16.** Overlay of  $^{13}\text{C}$  CP-MAS-ssNMR spectra for: (a) the **ind-sac** cocrystal synthesised from solution and (b,c) by milling after real-time monitoring experiments, along with spectra of starting materials (d)  **$\gamma$ -ind** and (e) **sac**.

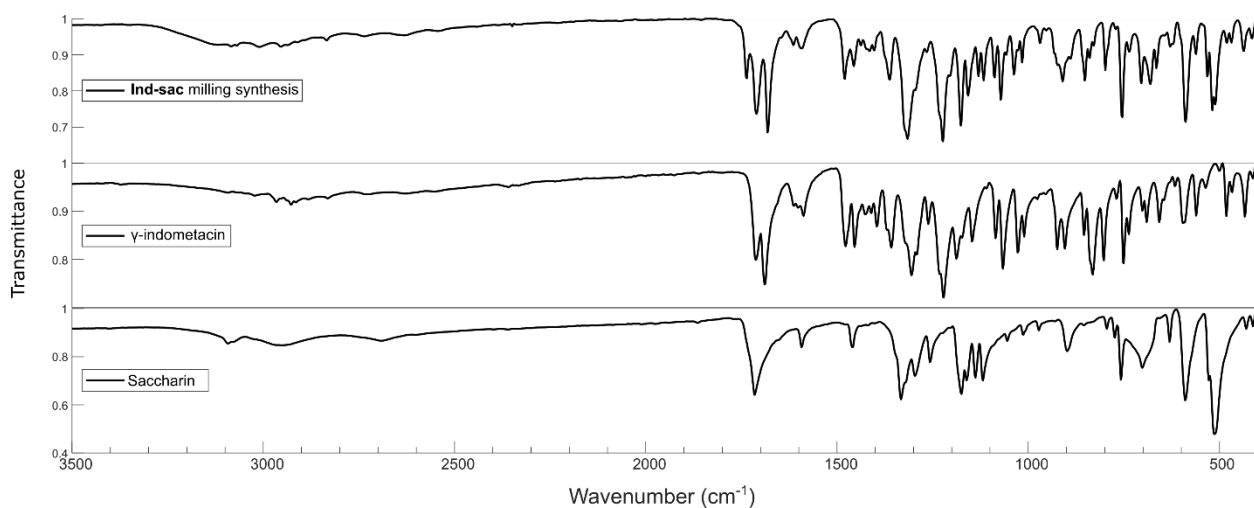

**Figure S17.** Fourier-transform infrared (FT-IR) spectra for (top-to-bottom): mechanochemically prepared **ind-sac** cocrystal (sample obtained after a real-time monitoring experiment),  **$\gamma$ -ind** and **sac**.

## 8. *In situ* Synchrotron Powder X-ray Diffraction Monitoring of Cocrystallisation by Milling

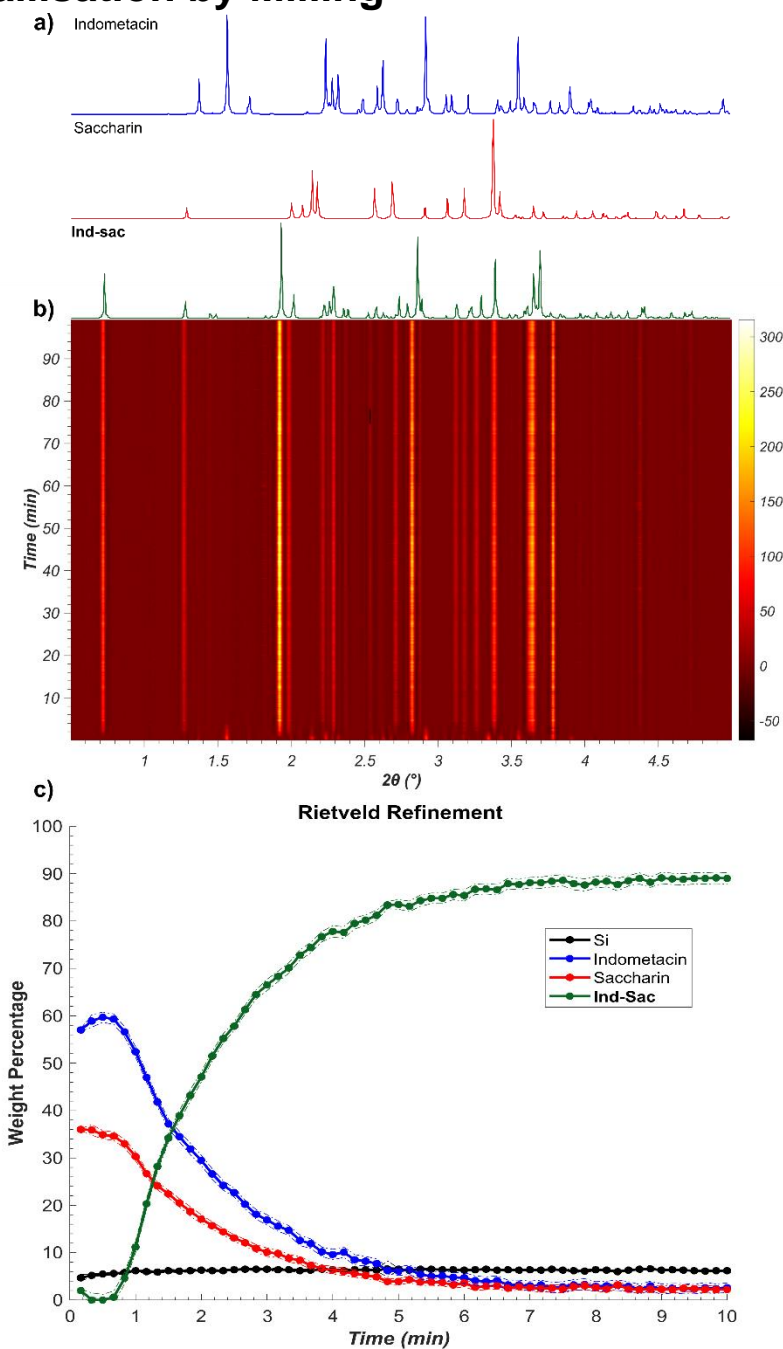

**Figure S18.** (a) Simulated XRPD patterns for  $\gamma$ -ind (CSD code INDMET), sac (CSD code SCCHRN03 and ind-sac cocrystal (CSD code UFERED). (b) Time-resolved synchrotron XRPD patterns showing the mechanochemical formation of ind-sac, in presence of crystalline silicon as an internal standard. (c) Weight percentage of each phase, as estimated by Rietveld refinement. The rate of conversion is slightly slower, than that observed by Raman and fluorescence emission measurements, likely due to the use of 7 mm steel milling balls.

## 9. Comparison of Predicted and Experimental Vibrational Spectra

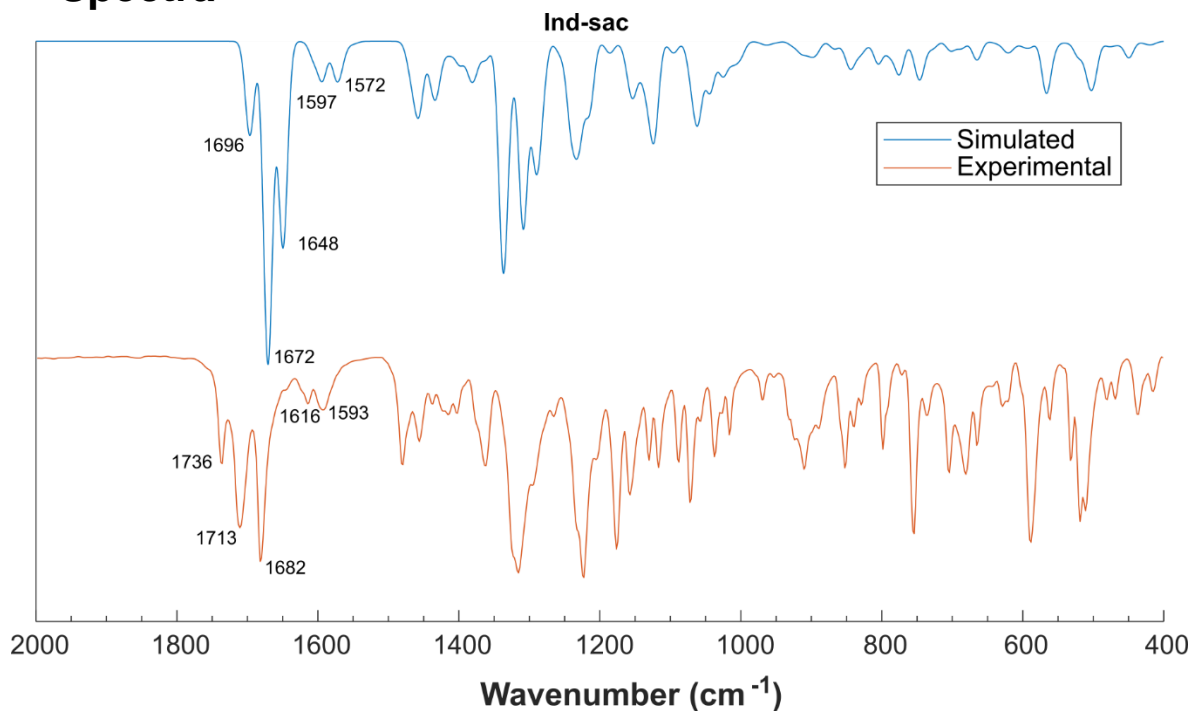

**Figure S19.** Comparison of the simulated (top) infrared spectrum obtained from periodic DFT calculations to the experimentally obtained (bottom) FTIR-ATR spectrum of the **ind-sac** cocrystal.

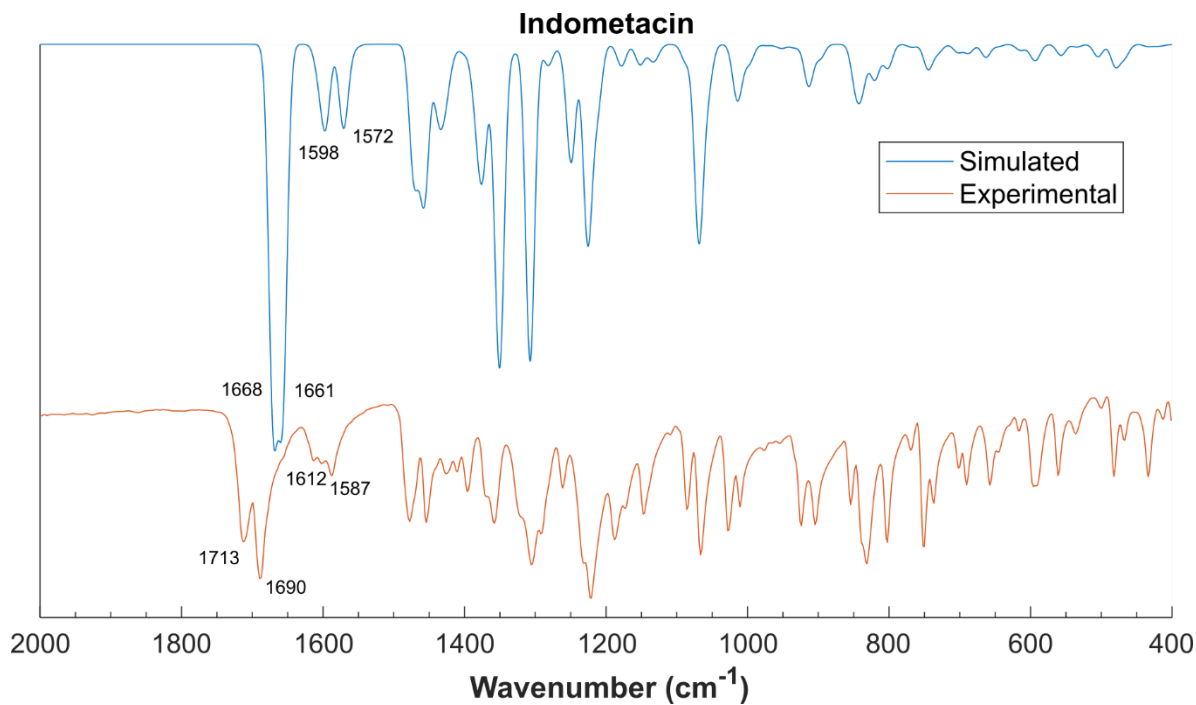

**Figure S20.** Comparison of the simulated (top) infrared spectrum obtained from periodic DFT calculations to the experimentally obtained (bottom) FTIR-ATR spectrum of  **$\gamma$ -ind**.

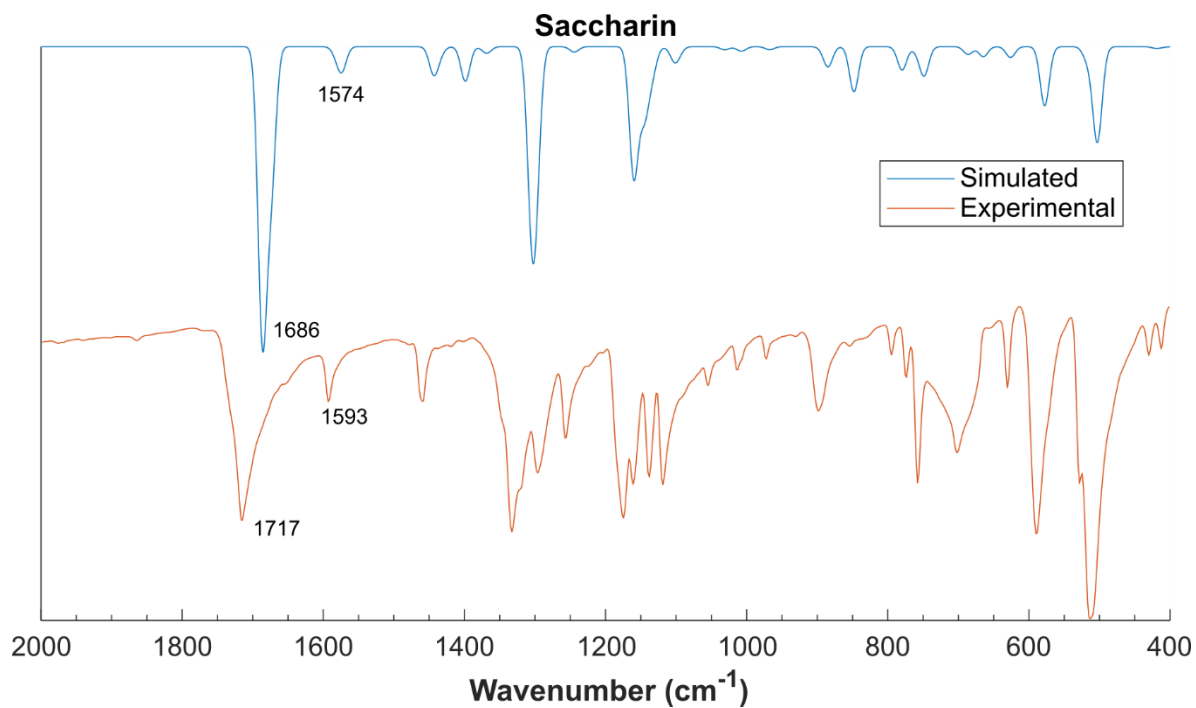

**Figure S21.** Comparison of the simulated (top) infrared spectrum obtained from periodic DFT calculations to the experimentally obtained (bottom) FTIR-ATR spectrum of solid **sac**.

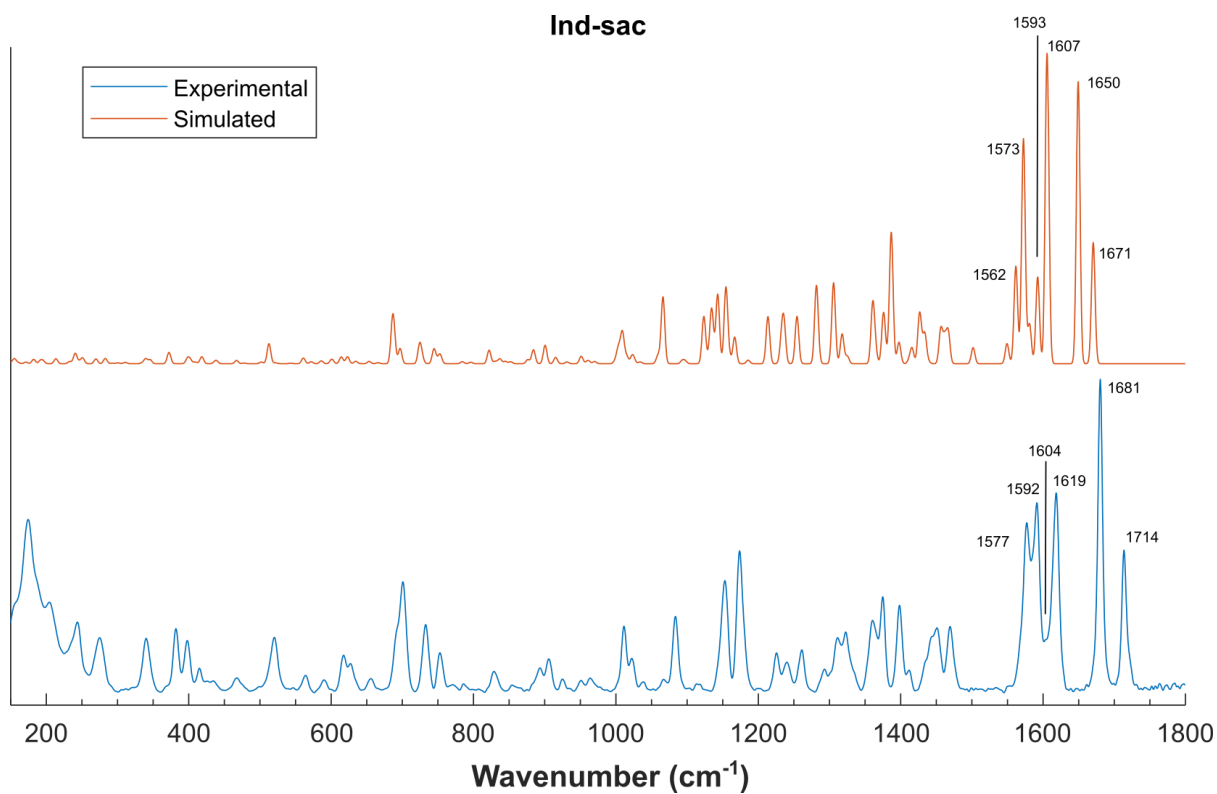

**Figure S22.** Comparison of the simulated (top) Raman spectrum obtained from periodic DFT calculations with the experimentally obtained (bottom) spectrum of the **ind-sac** cocrystal.

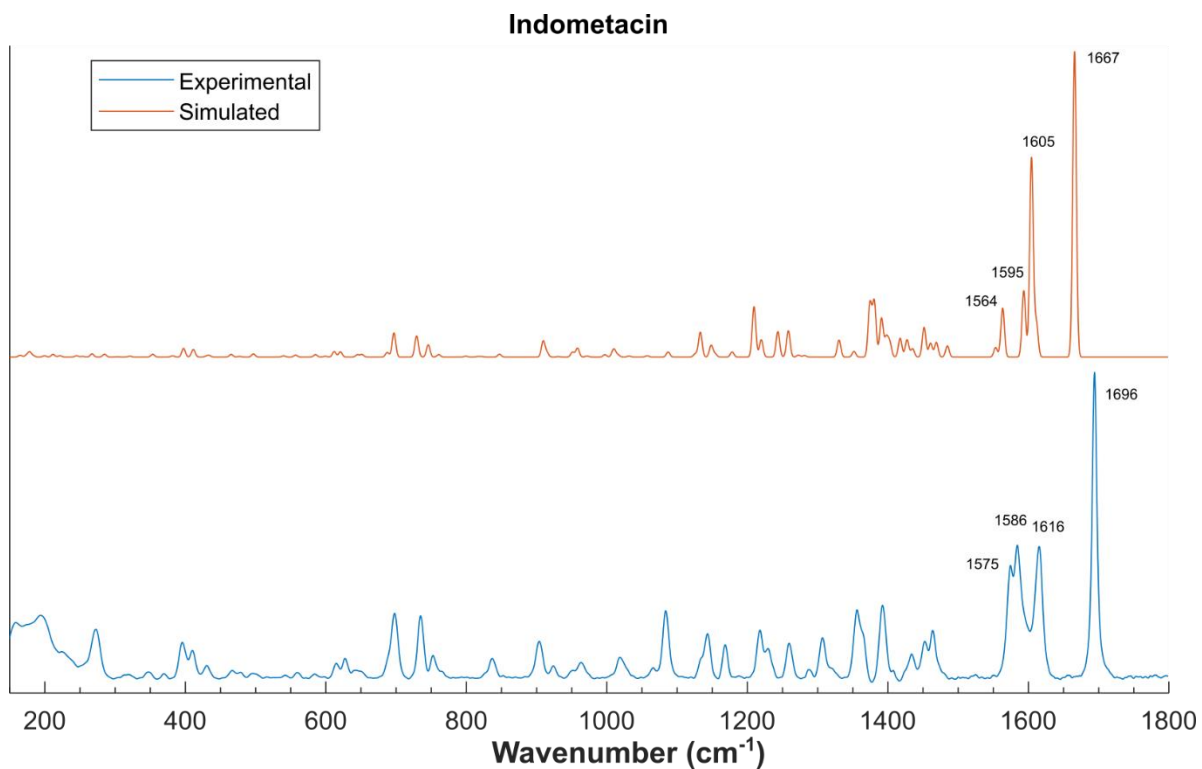

**Figure S23.** Comparison of the simulated (top) Raman spectrum obtained from periodic DFT calculations with the experimentally obtained (bottom) spectrum of  $\gamma$ -ind.

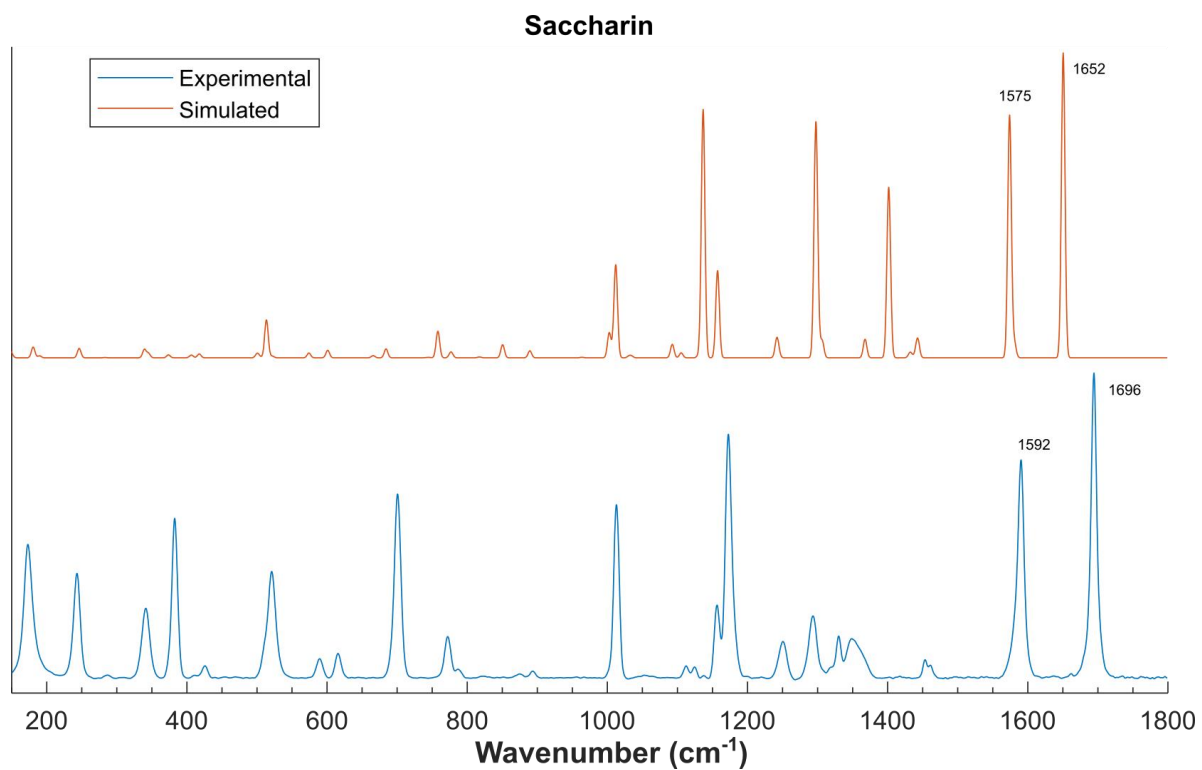

**Figure S24.** Comparison of the simulated (top) Raman spectrum obtained from periodic DFT calculations with the experimentally obtained (bottom) spectrum of solid sac.

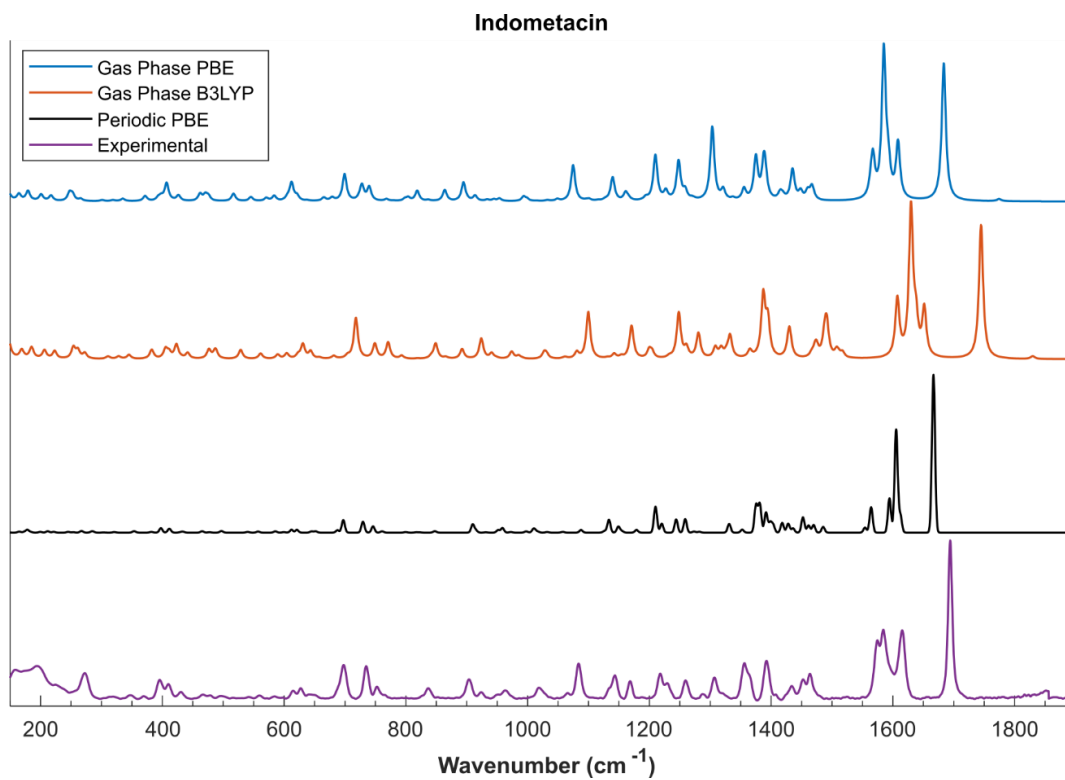

**Figure S25.** Comparison of experimental and calculated Raman spectra for **ind** (top-to-bottom): calculated in the gas phase using the PBE functional, calculated in the gas phase using the B3LYP functional, calculated for  **$\gamma$ -ind** using periodic DFT with the PBE-generalised gradient approximation functional and experimentally measured for  **$\gamma$ -ind**.



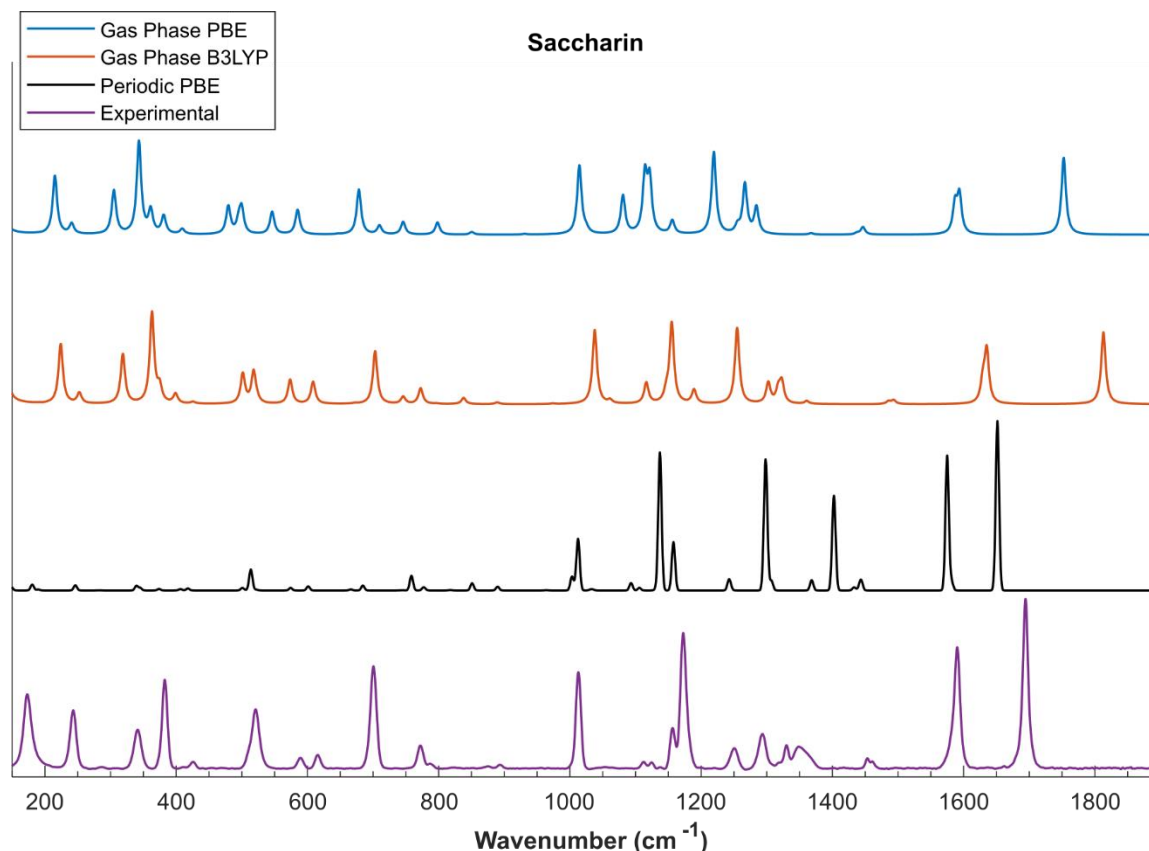

**Figure S26.** Comparison of experimental and calculated Raman spectra for **sac** (top-to-bottom): calculated in the gas phase using the PBE functional, calculated in the gas phase using the B3LYP functional, calculated for **sac** solid using periodic DFT with the PBE-generalised gradient approximation functional and experimentally measured for **sac** solid.

### Indometacin

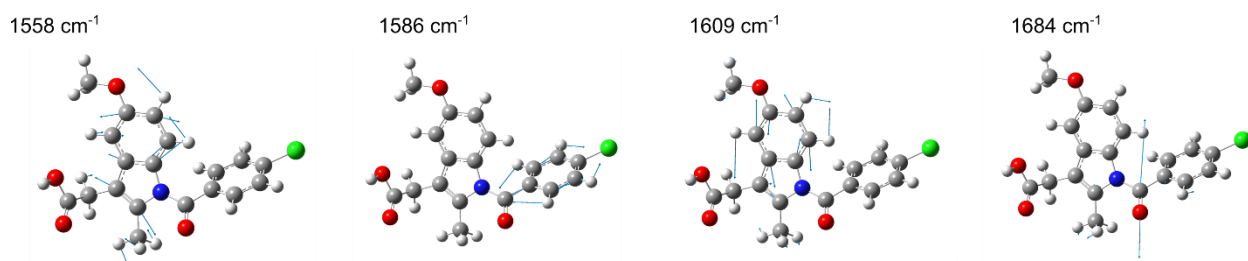

**Figure S27.** Key Raman-active vibrational modes of **ind** in the 1500-1800  $\text{cm}^{-1}$  region used for *in situ* monitoring of the reaction as determined by gas phase DFT calculations using the hybrid functional PBE0. The amplitude of displacement vectors has been increased for visual clarity.

## Saccharin

1587  $\text{cm}^{-1}$

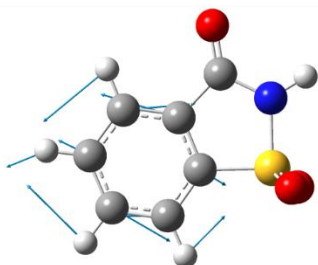

1594  $\text{cm}^{-1}$

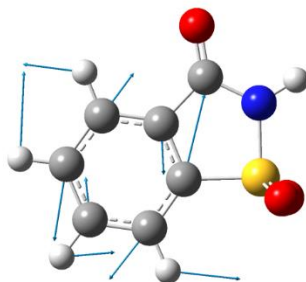

1753  $\text{cm}^{-1}$

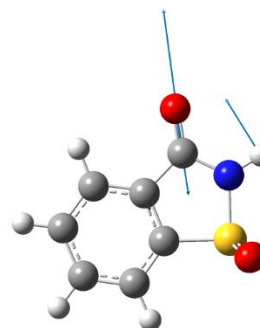

**Figure S28.** Key Raman-active vibrational modes of **sac** in the 1500-1800  $\text{cm}^{-1}$  region used for *in situ* monitoring of the reaction as determined by gas phase DFT calculations using the hybrid functional PBE0. The amplitude of displacement vectors has been increased for visual clarity.

## Ind-Sac

1650  $\text{cm}^{-1}$

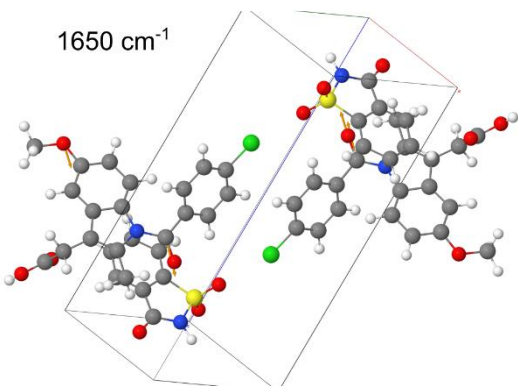

1670  $\text{cm}^{-1}$

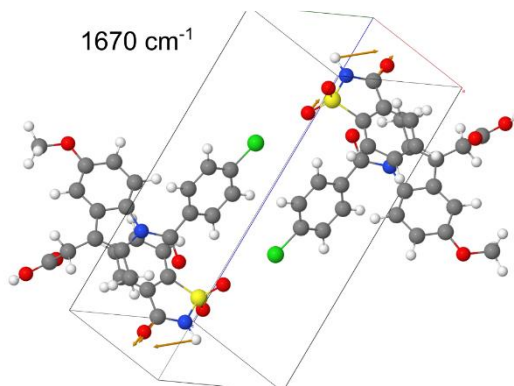

**Figure S29.** Key Raman-active vibrational modes of **ind-sac** which indicate the vibration at 1670  $\text{cm}^{-1}$  arising from the **sac** carbonyl moiety stretch and the vibration at 1650  $\text{cm}^{-1}$  arising from the **ind** carbonyl moiety stretch, as determined by periodic DFT calculations using the PBE functional. The amplitude of displacement vectors has been increased for visual clarity.

## 10. Comparison of Predicted and Experimental NMR Spectra

**Table S3.** Comparison of  $^{13}\text{C}$  CP-MAS-SSNMR chemical shift values (ppm) determined experimentally to those predicted from periodic DFT calculations, listed from highest to lowest chemical shift.

| saccharin  |           |                       | $\gamma$ -indometacin |           |                       | ind-sac    |           |                       |
|------------|-----------|-----------------------|-----------------------|-----------|-----------------------|------------|-----------|-----------------------|
| Experiment | Predicted | Difference (Pred-Exp) | Experiment            | Predicted | Difference (Pred-Exp) | Experiment | Predicted | Difference (Pred-Exp) |
| 163.45     | 163.67    | 0.22                  | 178.66                | 185.46    | 6.80                  | 178.43     | 183.55    | 5.12                  |
| 138.51     | 143.17    | 4.66                  | 167.38                | 169.48    | 2.10                  | 165.35     | 165.78    | 0.43                  |
| 138.51     | 141.19    | 2.68                  | 156.43                | 159.11    | 2.68                  | 161.72     | 163.59    | 1.87                  |
| 135.12     | 138.03    | 2.91                  | 141.11                | 148.54    | 7.43                  | 155.1      | 158.43    | 3.33                  |
| 126.13     | 129.19    | 3.06                  | 136.37                | 139.37    | 3.00                  | 138.49     | 145.19    | 6.70                  |
| 126.13     | 127.49    | 1.36                  | 134.15                | 136.01    | 1.86                  | 138.49     | 142.96    | 4.47                  |
| 121.71     | 123.7     | 1.99                  | 134.15                | 134.89    | 0.74                  | 138.49     | 141.54    | 3.05                  |
|            |           |                       | 131.75                | 134.83    | 3.08                  | 135.57     | 139.89    | 4.32                  |
|            |           |                       | 130.8                 | 133.16    | 2.36                  | 133.47     | 137.82    | 4.35                  |
|            |           |                       | 130.8                 | 132.76    | 1.96                  | 133.47     | 136.3     | 2.83                  |
|            |           |                       | 126.91                | 131.04    | 4.13                  | 131.46     | 135.01    | 3.55                  |
|            |           |                       | 126.26                | 128.51    | 2.25                  | 131.46     | 134.43    | 2.97                  |
|            |           |                       | 115.36                | 116.73    | 1.37                  | 131.46     | 133.23    | 1.77                  |
|            |           |                       | 112.35                | 116.46    | 4.11                  | 129.43     | 131.73    | 2.30                  |
|            |           |                       | 112.35                | 111.94    | -0.41                 | 129.43     | 130.07    | 0.64                  |
|            |           |                       | 97.68                 | 97.11     | -0.57                 | 126.57     | 128.76    | 2.19                  |
|            |           |                       | 54.88                 | 56.05     | 1.17                  | 126.57     | 128.74    | 2.17                  |
|            |           |                       | 27.89                 | 27.79     | -0.10                 | 126.57     | 127.83    | 1.26                  |
|            |           |                       | 13.2                  | 14.11     | 0.91                  | 118.77     | 120.63    | 1.86                  |
|            |           |                       |                       |           |                       | 114.68     | 117.09    | 2.41                  |
|            |           |                       |                       |           |                       | 112.99     | 116.13    | 3.14                  |
|            |           |                       |                       |           |                       | 112.99     | 113.24    | 0.25                  |
|            |           |                       |                       |           |                       | 101.57     | 101.76    | 0.19                  |
|            |           |                       |                       |           |                       | 55.01      | 56.18     | 1.17                  |
|            |           |                       |                       |           |                       | 28.82      | 28.95     | 0.13                  |
|            |           |                       |                       |           |                       | 13.67      | 13.08     | -0.59                 |

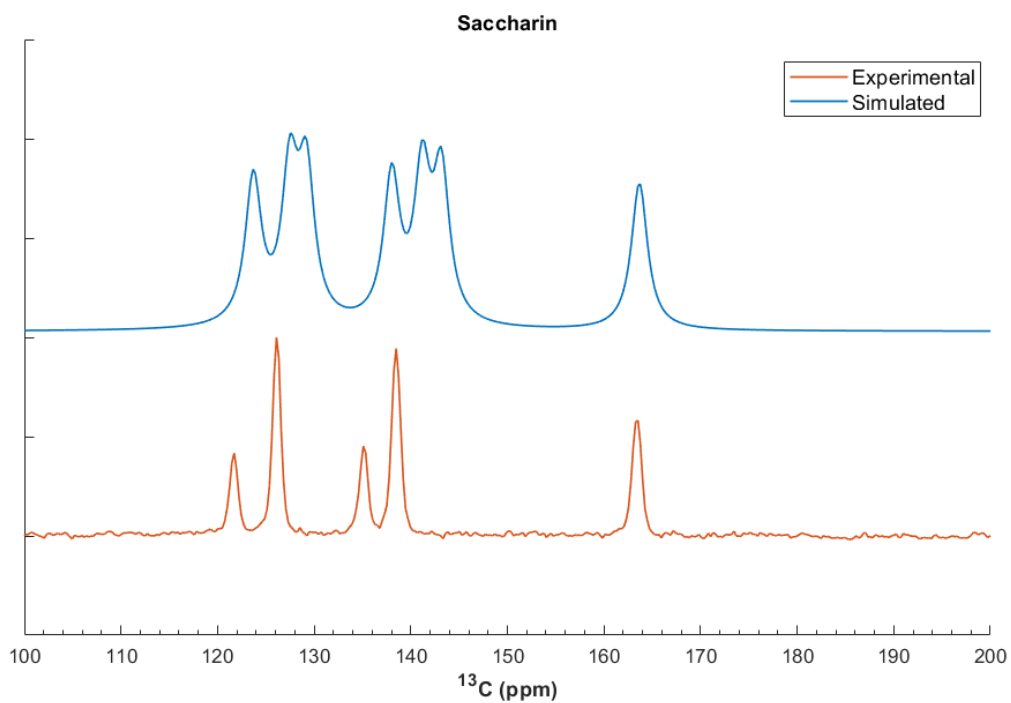

**Figure S30.** Comparison of the simulated  $^{13}\text{C}$  NMR spectrum (top) obtained from periodic DFT calculations with the experimentally obtained (bottom) spectrum of solid **sac**.

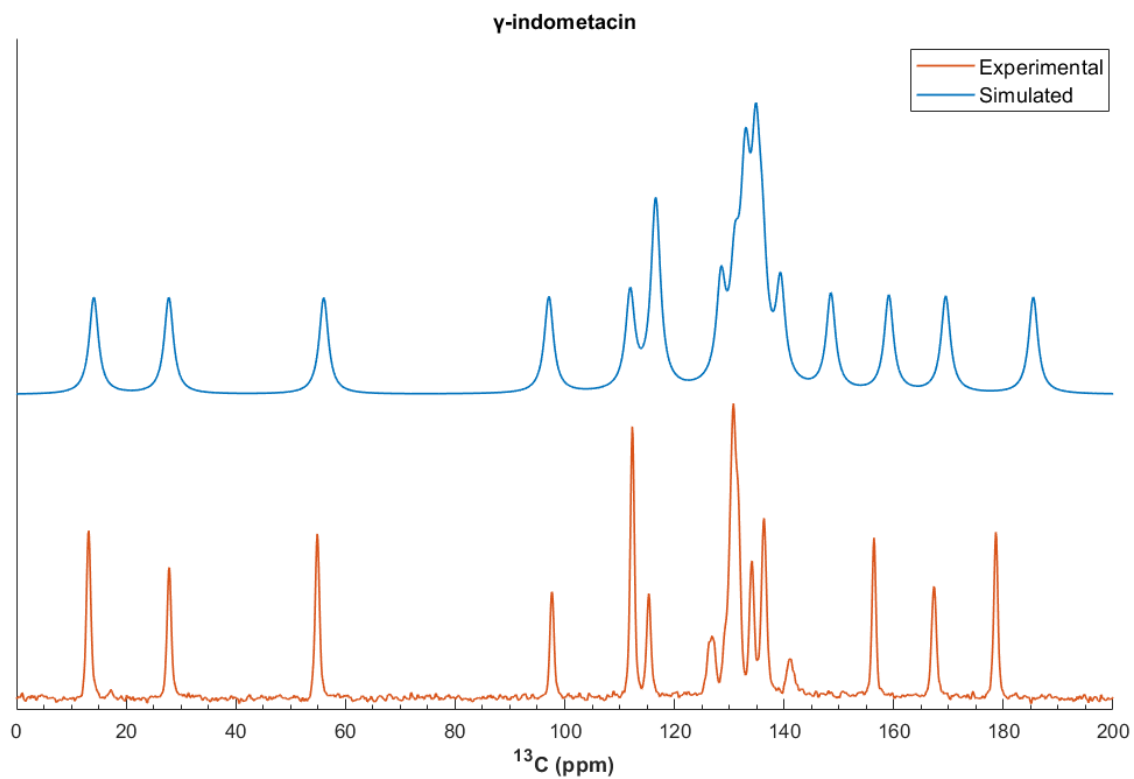

**Figure S31.** Comparison of the simulated  $^{13}\text{C}$  NMR spectrum (top) obtained from periodic DFT calculations with the experimentally obtained (bottom) spectrum of  $\gamma$ -**ind**.

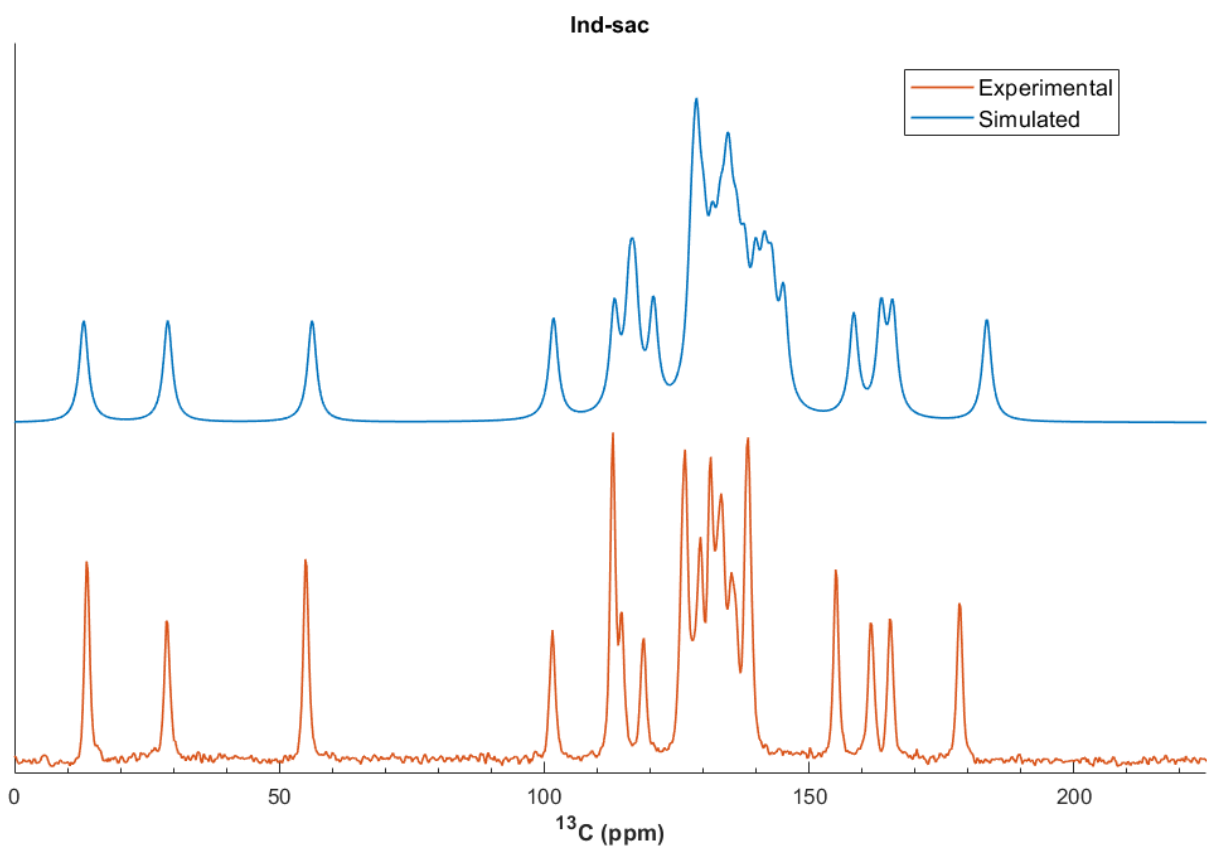

**Figure S32.** Comparison of the simulated  $^{13}\text{C}$  NMR spectrum (top) obtained from periodic DFT calculations with the experimentally obtained (bottom) spectrum of the **ind-sac** cocrystal.

**Table S4.** Predicted  $^{13}\text{C}$  CP-MAS-SSNMR chemical shift values from periodic DFT calculations for each carbon in the starting materials (solid **sac** and  **$\gamma$ -ind**), as well as the product **ind-sac** cocrystal. Carbon atoms with significant differences between starting material and cocrystal are highlighted in red.

|              | atom         | shielding / ppm    |               | chemical shift / ppm |               | Absolute difference / ppm |
|--------------|--------------|--------------------|---------------|----------------------|---------------|---------------------------|
|              |              | starting materials | cocrystal     | starting materials   | cocrystal     |                           |
| saccharin    | C1           | 43.13              | 42.79         | 127.49               | 127.83        | 0.34                      |
|              | C2           | 41.43              | 41.88         | 129.19               | 128.74        | 0.45                      |
|              | C3           | 32.59              | 32.8          | 138.03               | 137.82        | 0.21                      |
|              | <b>C4</b>    | <b>27.45</b>       | <b>30.73</b>  | <b>143.17</b>        | <b>139.89</b> | <b>3.28</b>               |
|              | <b>C5</b>    | <b>46.92</b>       | <b>49.99</b>  | <b>123.7</b>         | <b>120.63</b> | <b>3.07</b>               |
|              | C6           | 29.43              | 29.08         | 141.19               | 141.54        | 0.35                      |
|              | C7           | 6.95               | 7.03          | 163.67               | 163.59        | 0.08                      |
| indomethacin | C8           | 39.58              | 40.55         | 131.04               | 130.07        | 0.97                      |
|              | C9           | 53.89              | 54.49         | 116.73               | 116.13        | 0.6                       |
|              | C10          | 58.68              | 57.38         | 111.94               | 113.24        | 1.3                       |
|              | C11          | 11.51              | 12.19         | 159.11               | 158.43        | 0.68                      |
|              | <b>C12</b>   | <b>73.51</b>       | <b>68.86</b>  | <b>97.11</b>         | <b>101.76</b> | <b>4.65</b>               |
|              | C13          | 37.46              | 37.39         | 133.16               | 133.23        | 0.07                      |
|              | C14          | 54.16              | 53.53         | 116.46               | 117.09        | 0.63                      |
|              | <b>C15</b>   | <b>31.25</b>       | <b>27.66</b>  | <b>139.37</b>        | <b>142.96</b> | <b>3.59</b>               |
|              | C16          | 114.57             | 114.44        | 56.05                | 56.18         | 0.13                      |
|              | C17          | 142.83             | 141.67        | 27.79                | 28.95         | 1.16                      |
|              | C18          | -14.84             | -12.93        | 185.46               | 183.55        | 1.91                      |
|              | C19          | 156.51             | 157.54        | 14.11                | 13.08         | 1.03                      |
|              | <b>C20</b>   | <b>1.14</b>        | <b>4.84</b>   | <b>169.48</b>        | <b>165.78</b> | <b>3.7</b>                |
|              | C21          | 35.73              | 36.19         | 134.89               | 134.43        | 0.46                      |
|              | C22          | 34.61              | 34.32         | 136.01               | 136.3         | 0.29                      |
|              | C23          | 42.11              | 41.86         | 128.51               | 128.76        | 0.25                      |
| <b>C24</b>   | <b>22.08</b> | <b>25.43</b>       | <b>148.54</b> | <b>145.19</b>        | <b>3.35</b>   |                           |
| C25          | 37.86        | 38.89              | 132.76        | 131.73               | 1.03          |                           |
| C26          | 35.79        | 35.61              | 134.83        | 135.01               | 0.18          |                           |

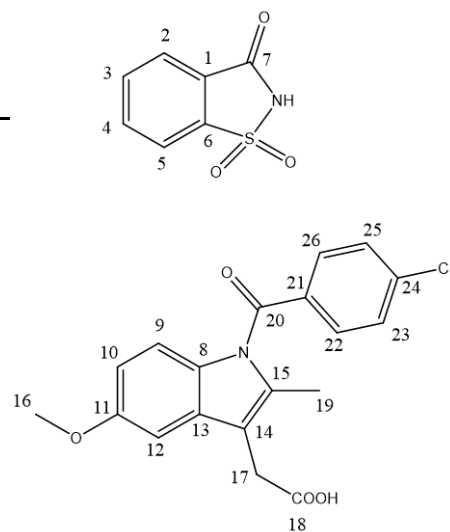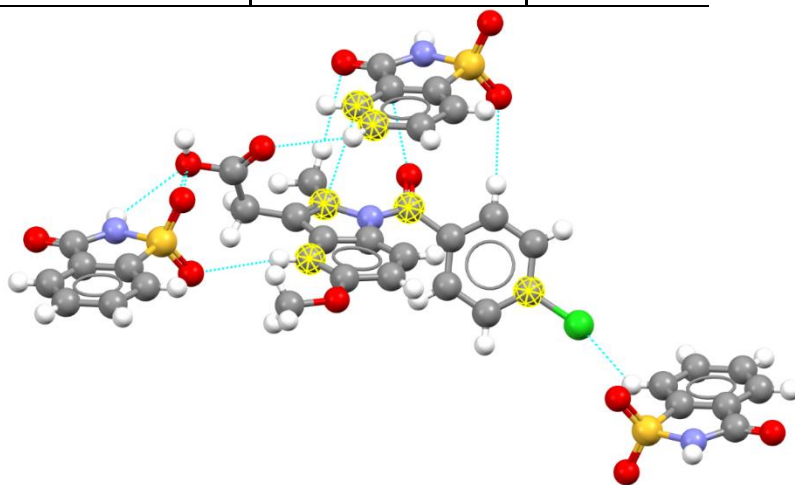

**Figure S33.** Visualisation of short contacts in the **ind-sac** cocrystal structure, with yellow highlights designating the carbon atoms exhibiting a difference in  $^{13}\text{C}$  SS-NMR shifts of more than 3 ppm between the respective **sac** and  **$\gamma$ -ind** starting materials and the **ind-sac** cocrystal, as calculated by periodic DFT.

## 11. TD-DFT Orbital Transitions

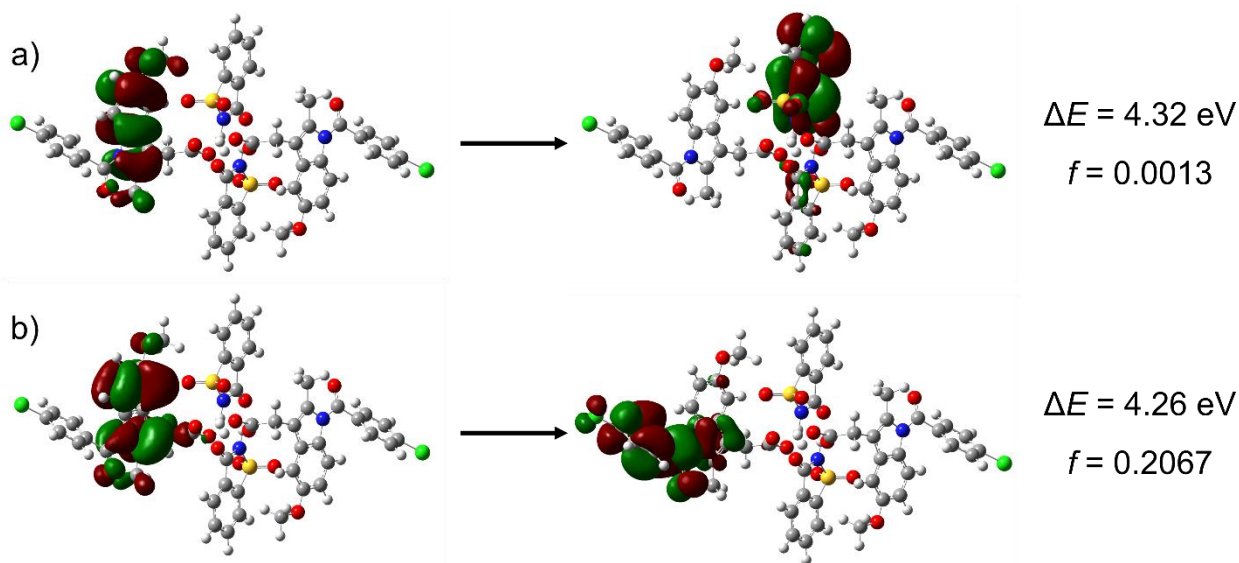

**Figure S34.** Molecular TD-DFT calculations using range-separated CAM-B3LYP functional on a cluster containing two **ind** and two **sac** molecules show that charge transfer state (a) has a very low oscillator strength, whereas the electronic transition localised on the **ind** molecule (b) is two orders of magnitude more intense.

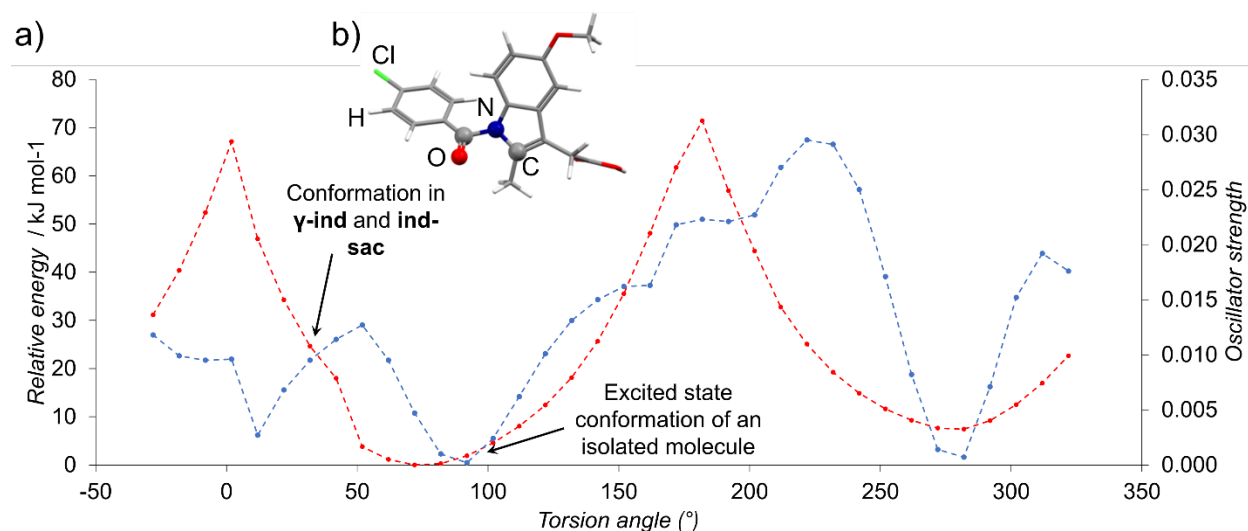

**Figure S35.** Calculated variation of the total energy (red) and oscillator strength (blue) for the S1 excited state of an **ind** molecule as a function of the orientation of the carbonyl group (the corresponding torsion angle is shown by the C, N, and O atoms in the molecular diagram (b)). The perpendicular orientation of the benzoyl fragment found in the lowest energy conformation of the S1 state is associated with an extremely small oscillator strength, which explains low emission intensity of **ind** in solution. Conversely, the solid-state conformation is locked with the torsion angle value of  $\sim 30^{\circ}$ , where the oscillator strength is distinctly non-zero.

## 12. Fitting of *in situ* spectroscopy datasets of indometacin amorphisation by milling

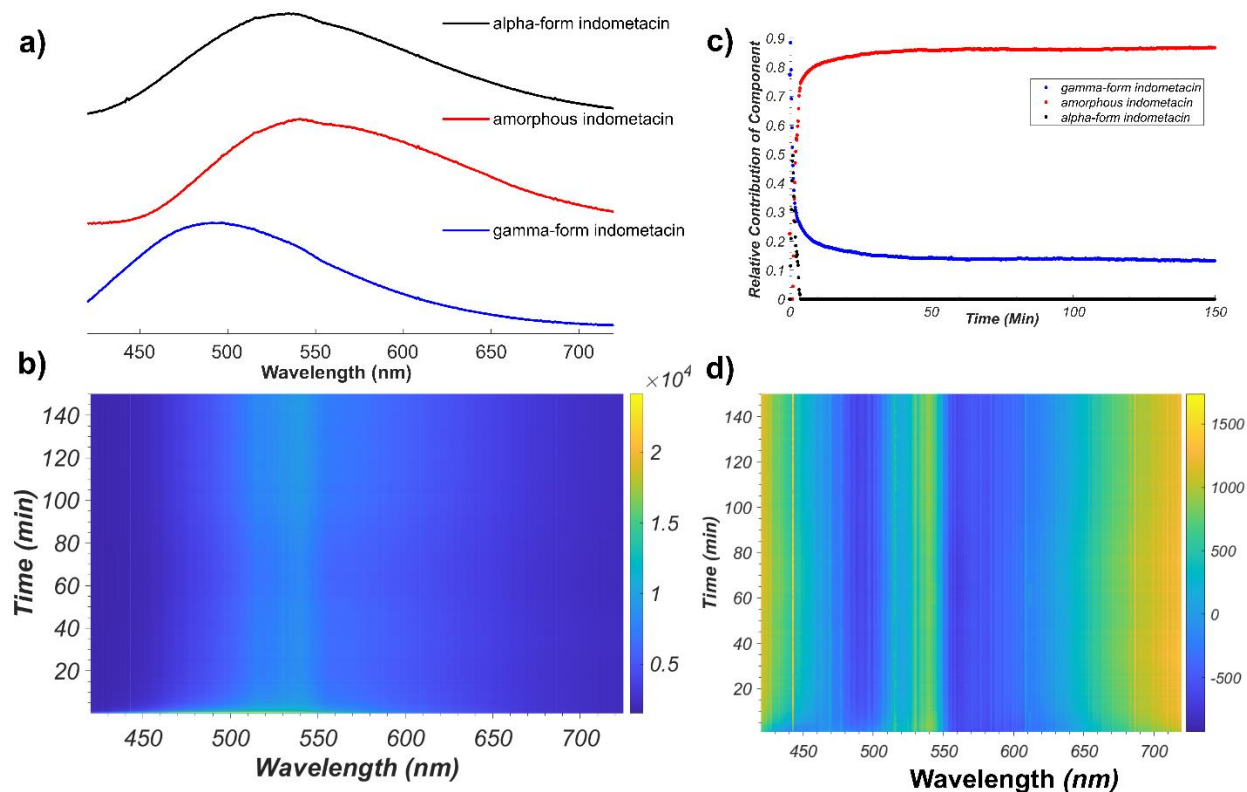

**Figure S36.** a) Normalised fluorescence spectra of  $\gamma$ -,  $\alpha$ -, and **am-ind** samples synthesised *via* reported protocols.<sup>1,2</sup> b) Time-resolved fluorescence emission acquired during ball-milling of  $\gamma$ -ind. c) Relative amounts of  $\gamma$ -,  $\alpha$ -, and **am-ind** estimated using non-negative least squares fitting of the *in situ* measured dataset, which fails to detect the emergence of  $\alpha$ -ind. d) Time-dependent residuals after NNLS fitting.



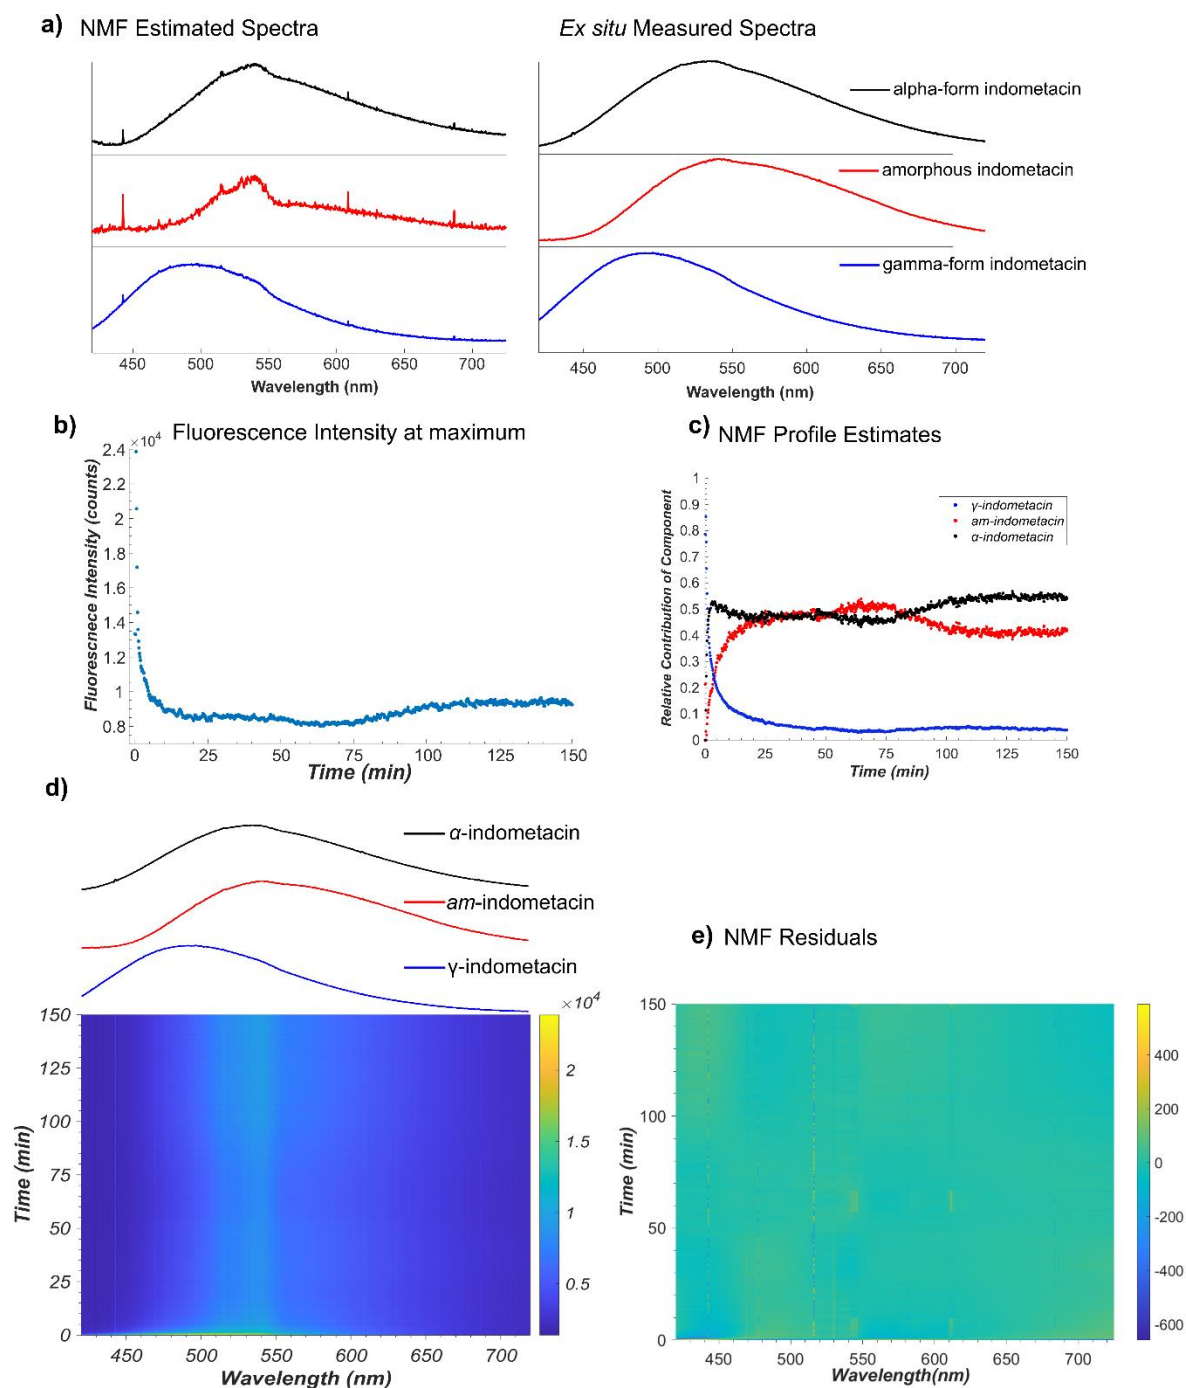

**Figure S37.** a) Non-negative matrix factorisation (NMF) estimated spectra (left) compared with *ex situ* normalised fluorescence emission spectra of  $\gamma$ -,  $\alpha$ -, and *am*-ind samples synthesised *via* reported protocols.<sup>1,2</sup> b) Intensity of the fluorescence maximum of each real-time measured fluorescence emission spectrum. c) Reaction profile obtained from NMF fitting. d) Time resolved fluorescence emission acquired during the milling amorphisation of indometacin. e) Time-dependent residuals of the NMF.

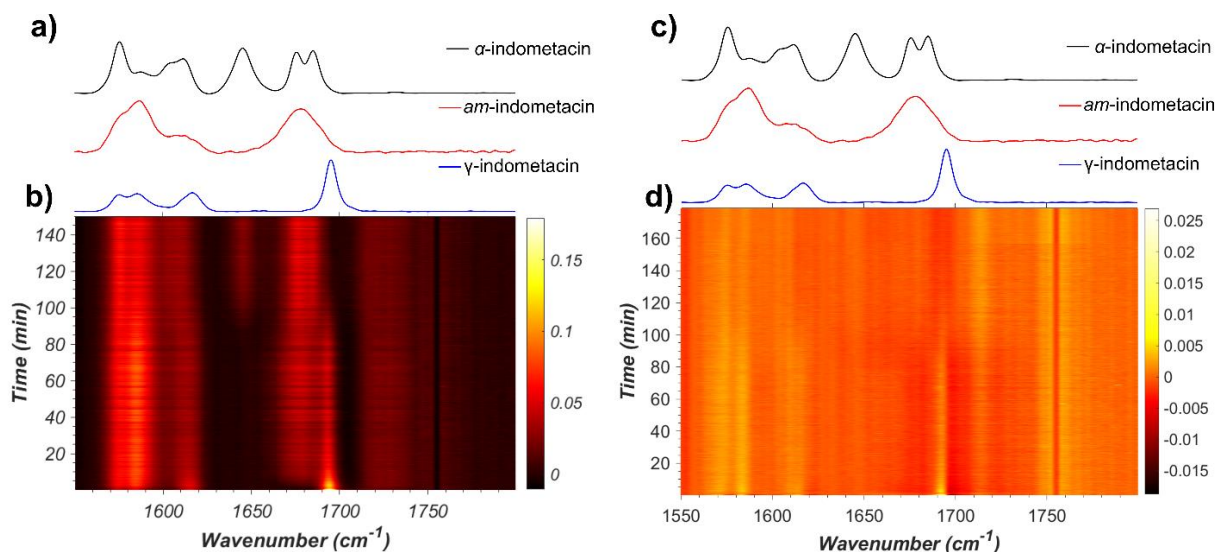

**Figure S38.** (a) Normalised Raman spectra of  $\gamma$ -,  $\alpha$ -, and **am-ind** samples synthesised through previously reported protocols.<sup>1,2</sup> (b) Time-resolved Raman spectra acquired during the milling of indometacin. (c) The same normalised spectra found in (a), and (d) time-dependent residuals after non-negative least squares fitting (NNLS) fitting.

### 13. Kinetic modelling of amorphisation

Amorphisation of  **$\gamma$ -ind**:  $\alpha(t) = e^{-kt} + b$  (1)      Formation of **am-ind**:  $\alpha(t) = 1 - e^{-kt} + b$  (2)

Where the constant  $b$  adjusts for the baseline (minimum or maximum) of the curve in the experimental data.

**Table S5.** General exponential kinetic models for the amorphisation of  **$\gamma$ -ind** and formation of **am-ind**.

| Kinetic Fit for Amorphisation of $\gamma$ -ind (1) from Raman Spectroscopy Measurements        |                                     |
|------------------------------------------------------------------------------------------------|-------------------------------------|
| Coefficients (with 95% confidence bounds):                                                     | Goodness of fit:                    |
| $k = 0.236$ (0.2282, 0.2438)                                                                   | Sum of Squares Due to Error: 0.709  |
| $b = 0.1569$ (0.1532, 0.1606)                                                                  | R-squared: 0.9237                   |
|                                                                                                | Adjusted R-squared: 0.9236          |
|                                                                                                | Root Mean Squared Error: 0.03773    |
| Kinetic Fit for Formation of am-ind (2) from Raman Spectroscopy Measurements                   |                                     |
| Coefficients (with 95% confidence bounds):                                                     | Goodness of fit:                    |
| $k = 0.2263$ (0.2189, 0.2336)                                                                  | Sum of Squares Due to Error: 0.713  |
| $b = -0.1667$ (-0.1705, -0.163)                                                                | R-squared: 0.9268                   |
|                                                                                                | Adjusted R-squared: 0.9267          |
|                                                                                                | Root Mean Squared Error: 0.03784    |
| Kinetic Fit for Amorphisation of $\gamma$ -ind (1) from Fluorescence Spectroscopy Measurements |                                     |
| Coefficients (with 95% confidence bounds):                                                     | Goodness of fit:                    |
| $k = 0.5182$ (0.5031, 0.5332)                                                                  | Sum of Squares Due to Error: 0.5392 |
| $b = 0.05131$ (0.04967, 0.05296)                                                               | R-squared: 0.8813                   |
|                                                                                                | Adjusted R-squared: 0.8812          |
|                                                                                                | Root Mean Squared Error: 0.02449    |

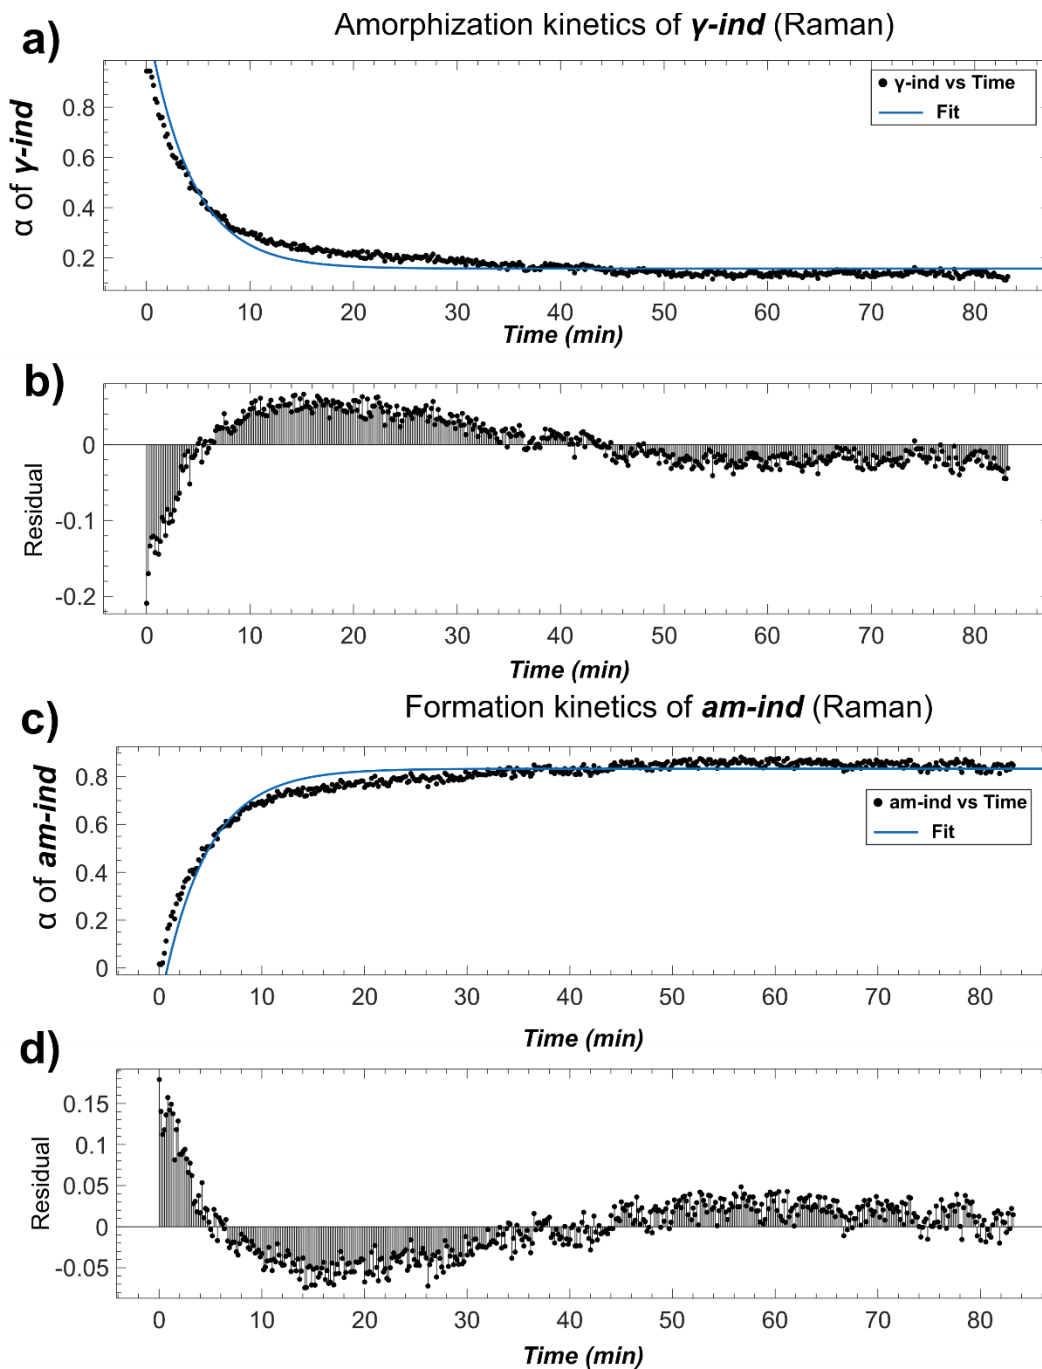

**Figure S39.** (a) Mol fraction of  $\gamma$ -ind ( $\alpha$ ) vs. time estimated from real-time Raman spectroscopy monitoring of the milling reaction, with fitting of the exponential kinetic model. The associated residuals after fitting are found in (b). (c) Mol fraction of  $am$ -ind ( $\alpha$ ) vs. time estimated from real-time Raman spectroscopy of the milling reaction with fit of the exponential kinetic model. The associated residuals after fitting are found in (d).

### Amorphization kinetics of $\gamma$ -ind (Fluorescence)

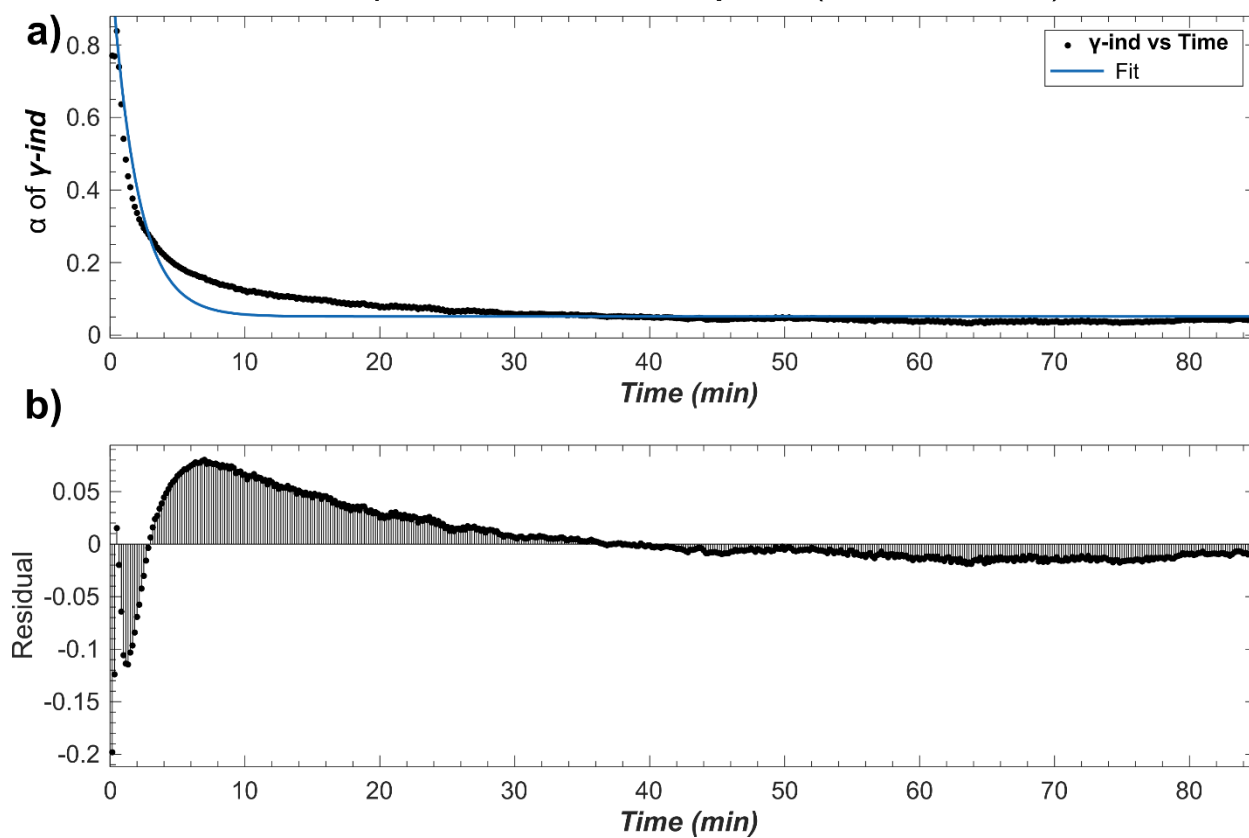

**Figure S40.** (a) Mol fraction of  $\gamma$ -ind ( $\alpha$ ) vs. time estimated from real-time monitoring of the milling reaction using fluorescence emission spectroscopy, including the fit of the exponential kinetic model. The associated residuals after fitting are found in (b).

## 14. Solid-State NMR and FTIR-ATR spectroscopy for indometacin amorphisation by ball-milling

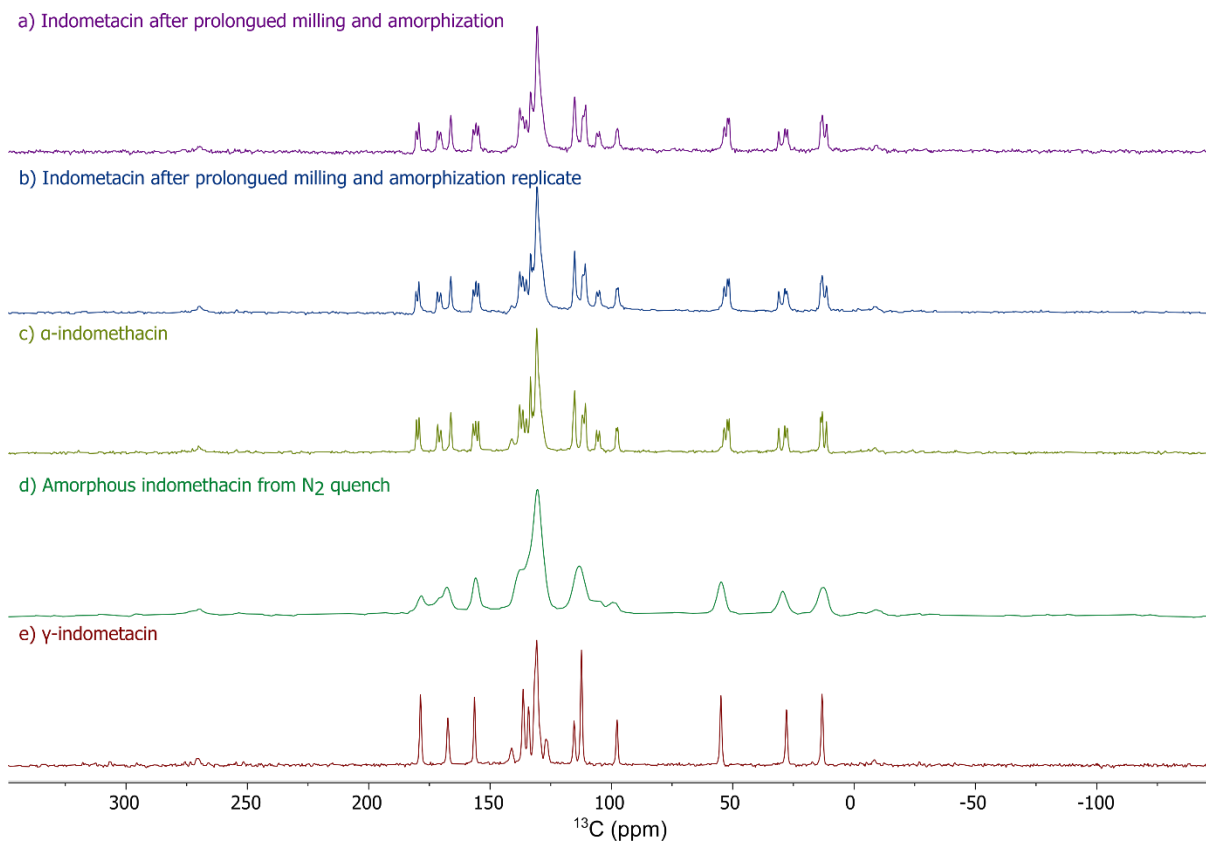

**Figure S41.** Comparison of  $^{13}\text{C}$  CP-MAS-ssNMR spectra of: (a, b)  $\gamma$ -**ind** after continuous neat grinding, (c) solution-synthesised  $\alpha$ -**ind**,<sup>1</sup> (d) **am-ind** synthesised by quenching molten **ind** in liquid nitrogen, and (e) the  $\gamma$ -**ind** starting material.

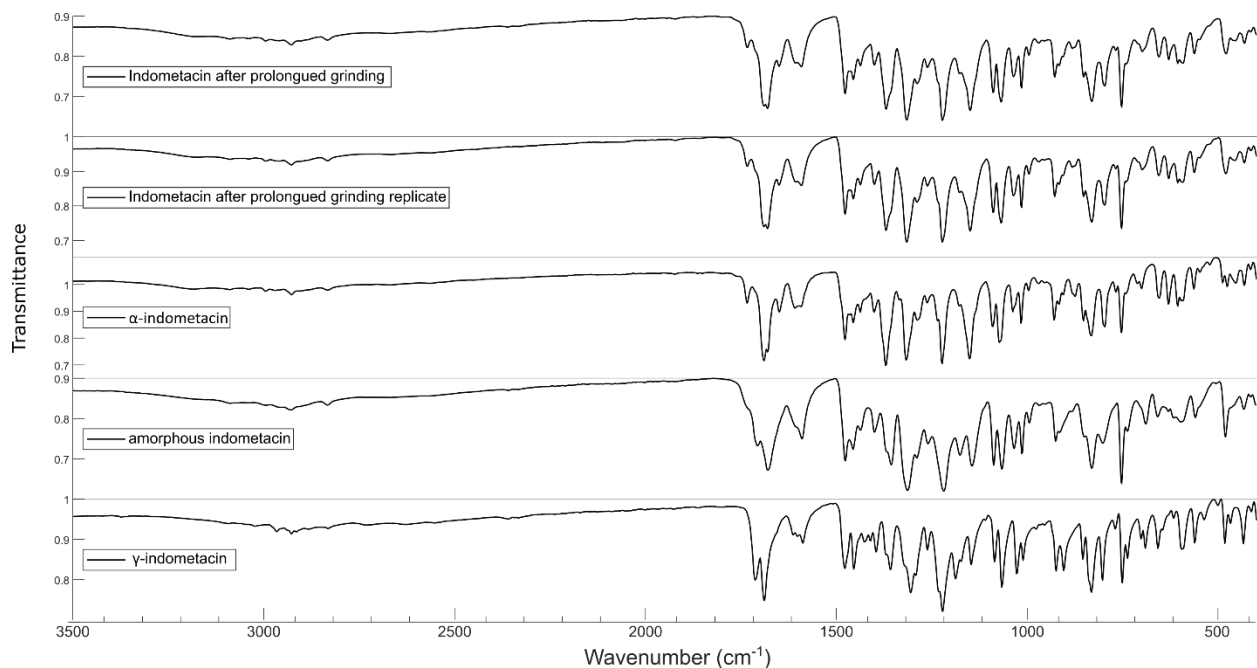

**Figure S42.** Comparison of FTIR-ATR spectra for (top-to-bottom): **γ-ind** after extended milling (two samples), **α-ind**,<sup>1</sup> **am-ind** synthesised by quenching of molten **ind** melt with liquid nitrogen, and the original **γ-ind** starting material.

#### References:

1. N. Kaneniwa, M. Otsuka and T. Hayashi, *Chem. Pharm. Bull.*, 1985, **33**, 3447-3455.
2. M. Yoshioka, B. C. Hancock and G. Zografi, *J. Pharm. Sci.*, 1994, **83**, 1700-1705.
